# Supplementary material
Source: ML conference proceedings conference paper supplement (https://proceedings.mlr.press/v119/cheng20e.html)
Supplement: Supplementary file [file cheng20e-supp.pdf]

## Appendix

### A. Proofs for Convergence under Gaussian Noise (Theorem 1)

#### A.1. Proof Overview

The main proof of Theorem 1 is contained in Appendix A.4.

Here, we outline the steps of our proof:

1. In Appendix A.2, we construct a coupling between (3) and (2) over a single step (i.e. for  $t \in [k\delta, (k+1)\delta]$ , for some  $k$  and  $\delta$ ).
2. Appendix A.3, we prove Lemma 1, which shows that under the coupling constructed in Step 1, a Lyapunov function  $f(x_T - y_T)$  contracts exponentially with rate  $\lambda$ , plus a discretization error term. The function  $f$  is defined in Appendix E, and sandwiches  $\|x_T - y_T\|_2$ . In Corollary 2, we apply the results of Lemma 1 recursively over multiple steps to give a bound on  $f(x_{k\delta} - y_{k\delta})$  for all  $k$ , and for sufficiently small  $\delta$ .
3. Finally, in Appendix A.4, we prove Theorem 1 by applying the results of Corollary 2, together with the fact that  $f(z)$  upper bounds  $\|z\|_2$  up to a constant factor.

#### A.2. A coupling construction

In this subsection, we will study the evolution of (3) and (2) over a small time interval. Specifically, we will study

$$dx_t = -\nabla U(x_t)dt + M(x_t)dB_t \quad (20)$$

$$dy_t = -\nabla U(y_0)dt + M(y_0)dB_t \quad (21)$$

One can verify that (20) is equivalent to (3), and (21) is equivalent to a single step of (2) (i.e. over an interval  $t \leq \delta$ ).

We first give the explicit coupling between (20) and (21): (A similar coupling in the continuous-time setting is first seen in (Gorham et al., 2016) in their proof of contraction of (3).)

Given arbitrary  $(x_0, y_0)$ , define  $(x_t, y_t)$  using the following coupled SDE:

$$x_t = x_0 + \int_0^t -\nabla U(x_s)ds + \int_0^t c_m dV_s + \int_0^t N(x_s)dW_s \quad (22)$$

$$y_t = y_0 + \int_0^t -\nabla U(y_0)dt + \int_0^t c_m(I - 2\gamma_s\gamma_s^T)dV_s + \int_0^t N(y_0)dW_s$$

Where  $dV_t$  and  $dW_t$  are two independent standard Brownian motion, and

$$\gamma_t := \frac{x_t - y_t}{\|x_t - y_t\|_2} \cdot \mathbb{1}\{\|x_t - y_t\|_2 \in [2\epsilon, \mathcal{R}_q)\} \quad (23)$$

By Lemma 6, we show that (20) has the same distribution as  $x_t$  in (22), and (21) has the same distribution as  $y_t$  in (22). Thus, for any  $t$ , the process  $(x_t, y_t)$  defined by (22) is a valid coupling for (20) and (21).

#### A.3. One step contraction

**Lemma 1** *Let  $f$  be as defined in Lemma 18 with parameters  $\epsilon$  satisfying  $\epsilon \leq \frac{\mathcal{R}_q}{\alpha_q \mathcal{R}_q^2 + 1}$ . Let  $x_t$  and  $y_t$  be as defined in (22).*

*If we assume that  $\mathbb{E}[\|y_0\|_2^2] \leq 8(R^2 + \beta^2/m)$  and  $T \leq \min\left\{\frac{\epsilon^2}{\beta^2}, \frac{\epsilon}{6L\sqrt{R^2 + \beta^2/m}}\right\}$ , then*

$$\mathbb{E}[f(x_T - y_T)] \leq e^{-\lambda T} \mathbb{E}[f(x_0 - y_0)] + 3T(L + L_N^2)\epsilon$$

**Remark 8** *For ease of reference:  $m, L, L_R, R$  are from Assumption A,  $c_m, \beta$  are from Assumption B,  $\alpha_q, \mathcal{R}_q, L_N, \lambda$  are defined in (7).*

#### Proof of Lemma 1

For notational convenience, for the rest of this proof, let us define  $z_t := x_t - y_t$  and  $\nabla_t := \nabla U(x_t) - \nabla U(y_t)$ ,  $\Delta_t := \nabla U(y_0) - \nabla U(y_t)$ ,  $N_t := N(x_t) - N(y_t)$ .

It follows from (22) that

$$dz_t = -\nabla_t dt + \Delta_t dt + 2c_m \gamma_t \gamma_t^T dV_t + (N_t + N(y_t) - N(y_0)) dW_t \quad (24)$$

Using Ito's Lemma, the dynamics of  $f(z_t)$  is given by

$$\begin{aligned} df(z_t) &= \langle \nabla f(z_t), dz_t \rangle + 2c_m^2 \text{tr}(\nabla^2 f(z_t)(\gamma_t \gamma_t^T)) dt + \frac{1}{2} \text{tr}(\nabla^2 f(z_t)(N_t + N(y_t) - N(y_0))^2) dt \\ &= \underbrace{-\langle \nabla f(z_t), \nabla_t \rangle}_{\textcircled{1}} dt + \underbrace{\langle \nabla f(z_t), \Delta_t \rangle}_{\textcircled{2}} dt + \underbrace{\langle \nabla f(z_t), 2c_m \gamma_t \gamma_t^T dV_t + (N_t + N(y_t) - N(y_0)) dW_t \rangle}_{\textcircled{3}} \\ &\quad + \underbrace{2c_m^2 \text{tr}(\nabla^2 f(z_t)(\gamma_t \gamma_t^T))}_{\textcircled{4}} dt + \underbrace{\frac{1}{2} \text{tr}(\nabla^2 f(z_t)(N_t + N(y_t) - N(y_0))^2)}_{\textcircled{5}} dt \end{aligned} \quad (25)$$

③ goes to 0 when we take expectation, so we will focus on ①, ②, ④, ⑤. We will consider 3 cases

**Case 1:**  $\|z_t\|_2 \leq 2\epsilon$

From item 1(c) of Lemma 18,  $\|\nabla f(z)\|_2 \leq 1$ . Using Assumption A.1,  $\|\nabla_t\| \leq L\|z_t\|_2$ , so that

$$\textcircled{1} \leq \|\nabla_t\|_2 \leq L\|z_t\|_2 \leq 2L\epsilon$$

Also by Cauchy Schwarz,

$$\textcircled{2} = \langle \nabla f(z_t), \Delta_t \rangle \leq \|\Delta_t\|_2 \leq L\|y_t - y_0\|_2$$

Since  $\gamma_t = 0$  in this case by definition in (23), ④ = 0.

Using Lemma 18.2.c.  $\|\nabla^2 f(z_t)\|_2 \leq \frac{2}{\epsilon}$ , so that

$$\begin{aligned} \textcircled{5} &\leq \frac{1}{\epsilon} \left( \text{tr}(N_t^2 + N(y_t) - N(y_0))^2 \right) \\ &\leq \frac{2}{\epsilon} \left( \text{tr}(N_t^2) + \text{tr}((N(y_t) - N(y_0))^2) \right) \\ &\leq \frac{2L_N^2}{\epsilon} \left( \|z_t\|_2^2 + \|y_t - y_0\|_2^2 \right) \\ &\leq 4L_N^2 \epsilon + \frac{2L_N^2}{\epsilon} \|y_t - y_0\|_2^2 \end{aligned}$$

Where the second inequality is by Young's inequality, the third inequality is by item 2 of Lemma 16, the fourth inequality is by our assumption that  $\|z_t\|_2 \leq 2\epsilon$ .

Summing these,

$$\textcircled{1} + \textcircled{2} + \textcircled{4} + \textcircled{5} \leq 4(L + L_N^2)\epsilon + L\|y_t - y_0\|_2 + \frac{2L_N^2}{\epsilon} \|y_t - y_0\|_2^2$$

**Case 2:**  $\|z_t\|_2 \in (2\epsilon, \mathcal{R}_q)$

In this case,  $\gamma_t = \frac{z_t}{\|z_t\|_2}$ . Let  $q$  be as defined in (39) and  $g$  be as defined in Lemma 20. By items 1(b) and 2(b) of Lemma 18 and items 1(b) and 2(b) of Lemma 20,

$$\begin{aligned} \nabla f(z_t) &= q'(g(z_t)) \nabla g(z_t) \\ &= q'(g(z_t)) \frac{z_t}{\|z_t\|_2} \\ \nabla^2 f(z_t) &= q''(g(z_t)) \nabla g(z_t) \nabla g(z_t)^T + q'(g(z_t)) \nabla^2 g(z_t) \\ &= q''(g(z_t)) \frac{z_t z_t^T}{\|z_t\|_2^2} + q'(g(z_t)) \frac{1}{\|z_t\|_2} \left( I - \frac{z_t z_t^T}{\|z_t\|_2^2} \right) \end{aligned}$$

Once again, by Assumption A.3,

$$\textcircled{1} \leq q'(g(z_t)) \|\nabla_t\|_2 \leq q'(g(z_t)) \cdot L_R \cdot \|z_t\|_2 \leq L \cdot q'(g(z_t))g(z_t) + 2L\epsilon$$

Where the last inequality uses Lemma 20.4. We can also verify that

$$\textcircled{2} \leq L\|y_t - y_0\|_2$$

Using the expression for  $\nabla^2 f(z_t)$ ,

$$\textcircled{4} = 2c_m^2 \text{tr}(\nabla^2 f(z_t) \gamma_t \gamma_t^T) = 2c_m^2 \cdot q''(g(z_t))$$

Finally,

$$\begin{aligned} \textcircled{5} &= \frac{1}{2} \text{tr} \left( \nabla^2 f(z_t) (N_t + N(y_t) - N(y_0))^2 \right) \\ &= \frac{1}{2} \text{tr} \left( \left( q''(g(z_t)) \frac{z_t z_t^T}{\|z_t\|_2^2} + q'(g(z_t)) \frac{1}{\|z_t\|_2} \left( I - \frac{z_t z_t^T}{\|z_t\|_2^2} \right) \right) (N_t + N(y_t) - N(y_0))^2 \right) \\ &\leq \frac{1}{2} \text{tr} \left( \left( q'(g(z_t)) \frac{1}{\|z_t\|_2} \left( I - \frac{z_t z_t^T}{\|z_t\|_2^2} \right) \right) (N_t + N(y_t) - N(y_0))^2 \right) \\ &\leq \frac{q'(g(z_t))}{\|z_t\|_2} \cdot \left( \text{tr}(N_t^2) + \text{tr}((N(y_t) - N(y_0))^2) \right) \\ &\leq q'(g(z_t)) \cdot L_N^2 \|z_t\|_2 + \frac{L_N^2 \|y_t - y_0\|_2^2}{2\epsilon} \\ &\leq q'(g(z_t)) \cdot L_N^2 g(z_t) + \frac{L_N^2 \|y_t - y_0\|_2^2}{2\epsilon} + 2L_N^2 \epsilon \end{aligned}$$

The above uses multiples times the fact that  $0 \leq q' \leq 1$  and  $q'' \leq 0$  (proven in items 3 and 4 of Lemma 21). The second inequality is by Young's inequality, the third inequality is by item 2 of Lemma 16, the fourth inequality uses item 4 of Lemma 20.

Summing these,

$$\begin{aligned} \textcircled{1} + \textcircled{2} + \textcircled{4} + \textcircled{5} &\leq (L_R + L_N^2) q'(g(z_t))g(z_t) + 2c_m^2 q''(g(z_t)) + \frac{L_N^2 \|y_t - y_0\|_2^2}{2\epsilon} + 2(L + L_N^2)\epsilon \\ &\leq - \frac{2c_m^2 \exp\left(-\frac{7\alpha_q \mathcal{R}_q^2}{3}\right)}{32\mathcal{R}_q^2} q(g(z_t)) + \frac{L_N^2 \|y_t - y_0\|_2^2}{2\epsilon} + 2(L + L_N^2)\epsilon \\ &\leq -\lambda q(g(z_t)) + \frac{L_N^2 \|y_t - y_0\|_2^2}{2\epsilon} + 2(L + L_N^2)\epsilon \\ &= -\lambda f(z_t) + \frac{L_N^2 \|y_t - y_0\|_2^2}{2\epsilon} + 2(L + L_N^2)\epsilon + L\|y_t - y_0\|_2 \end{aligned}$$

Where the last inequality follows from Lemma 21.1. and the definition of  $\lambda$  in (7).

**Case 3:**  $\|z_t\|_2 \geq \mathcal{R}_q$

In this case,  $\gamma_t = 0$ . Similar to case 2,

$$\nabla f(z_t) = q'(g(z_t)) \frac{z_t}{\|z_t\|_2}$$

Thus by Assumption A.3,

$$\begin{aligned} \textcircled{1} &= \left\langle q'(g(z_t)) \frac{z_t}{\|z_t\|_2}, -\nabla_t \right\rangle \\ &\leq -mq'(g(z_t))\|z_t\|_2 \end{aligned}$$

Where the inequality is by Assumption A.3.

For identical reasons as in Case 1, ②  $\leq L_R \|y_t - y_0\|_2$ , and ④ = 0. Finally,

$$\begin{aligned}
 \textcircled{5} &= \frac{1}{2} \text{tr} \left( \nabla^2 f(z_t) (N_t + N(y_t) - N(y_0))^2 \right) \\
 &= \frac{1}{2} \text{tr} \left( \left( q''(g(z_t)) \frac{z_t z_t^T}{\|z_t\|_2^2} + q'(g(z_t)) \frac{1}{\|z_t\|_2} \left( I - \frac{z_t z_t^T}{\|z_t\|_2^2} \right) \right) (N_t + N(y_t) - N(y_0))^2 \right) \\
 &\leq \frac{1}{2} \text{tr} \left( \left( q'(g(z_t)) \frac{1}{\|z_t\|_2} \left( I - \frac{z_t z_t^T}{\|z_t\|_2^2} \right) \right) (N_t + N(y_t) - N(y_0))^2 \right) \\
 &\leq \frac{q'(g(z_t))}{\|z_t\|_2} \cdot \left( \text{tr}(N_t^2) + \text{tr}((N(y_t) - N(y_0))^2) \right)
 \end{aligned}$$

Where the first inequality is because  $q'' \leq 0$  from item 4 of Lemma 21, the second inequality is by Young's inequality. (These steps are identical to Case 2). Continuing from above, and using item 2 and 3 of Lemma 16,

$$\begin{aligned}
 \textcircled{5} &\leq q'(g(z_t)) \cdot \left( \frac{8\beta^2 L_N}{c_m} + \frac{L_N^2 \|y_t - y_0\|_2^2}{\epsilon} \right) \\
 &\leq q'(g(z_t)) \cdot \left( \frac{m}{2} \|z_t\|_2 \right) + q'(g(z_t)) \cdot \left( \frac{L_N^2 \|y_t - y_0\|_2^2}{\epsilon} \right)
 \end{aligned}$$

Where the second inequality is by our definition of  $\mathcal{R}_q$  in the Lemma statement, which ensures that  $\frac{8\beta^2 L_N}{c_m} \leq \frac{m}{2} \mathcal{R}_q \leq \frac{m}{2} \|z_t\|_2$ .

Thus

$$\begin{aligned}
 &\textcircled{1} + \textcircled{2} + \textcircled{4} + \textcircled{5} \\
 &\leq -mq'(g(z_t)) \|z_t\|_2 + L_R \|y_t - y_0\|_2 + \frac{m}{2} q'(g(z_t)) \|z_t\|_2 + q'(g(z_t)) \cdot \left( \frac{L_N^2 \|y_t - y_0\|_2^2}{\epsilon} \right) \\
 &\leq -\frac{m}{2} q'(g(z_t)) \|z_t\|_2 + \frac{L_N^2}{\epsilon} \|y_t - y_0\|_2^2 + L \|y_t - y_0\|_2 \\
 &\leq -\lambda f(z_t) + \frac{L_N^2}{\epsilon} \|y_t - y_0\|_2^2 + L \|y_t - y_0\|_2
 \end{aligned}$$

where the second inequality uses  $q' \leq 1$  from item 3 of Lemma 21, the third inequality uses our definition of  $\lambda$  in (7).

Combining the three cases, (25) can be upper bounded with probability 1:

$$df(z_t) \leq -\lambda f(z_t) + \frac{L_N^2}{\epsilon} \|y_t - y_0\|_2^2 + L \|y_t - y_0\|_2 + \langle \nabla f(z_t), 2c_m \gamma_t \gamma_t^T dV_t + (N_t + N(y_t) - N(y_0)) dW_t \rangle$$

To simplify notation, let us define  $G_t \in \mathbb{R}^{1 \times 2d}$  as  $G_t := [\nabla f(z_t)^T 2c_m \gamma_t \gamma_t^T, \nabla f(z_t)^T (N_t + N(y_t) - N(y_0))]$ , and let  $A_t$  be a  $2d$ -dimensional Brownian motion from concatenating  $A_t = \begin{bmatrix} V_t \\ W_t \end{bmatrix}$ . Thus

$$df(z_t) \leq -\lambda f(z_t) dt + \left( \frac{L_N^2}{\epsilon} \|y_t - y_0\|_2^2 + L \|y_t - y_0\|_2 \right) + G_t dA_t.$$

We will study the Lyapunov function

$$\mathcal{L}_t := f(z_t) - \int_0^t e^{-\lambda(t-s)} \left( \frac{L_N^2}{\epsilon} \|y_s - y_0\|_2^2 + L \|y_s - y_0\|_2 \right) ds - \int_0^t e^{-\lambda(t-s)} G_s dA_s.$$

By taking derivatives, we see that

$$\begin{aligned}
 d\mathcal{L}_t &\leq -\lambda f(z_t)dt + \left( \frac{L_N^2}{\epsilon} \|y_t - y_0\|_2^2 + L \|y_t - y_0\|_2 \right) dt + G_t dA_t \\
 &\quad + \lambda \left( \int_0^t e^{-\lambda(t-s)} \left( \frac{L_N^2}{\epsilon} \|y_s - y_0\|_2^2 + L \|y_s - y_0\|_2 \right) ds \right) dt - \left( \frac{L_N^2}{\epsilon} \|y_t - y_0\|_2^2 + L \|y_t - y_0\|_2 \right) dt \\
 &\quad + \lambda \left( \int_0^t e^{-\lambda(t-s)} G_s dA_s \right) dt - G_t dA_t \\
 &= -\lambda \mathcal{L}_t dt
 \end{aligned}$$

We can then apply Gronwall's Lemma to  $\mathcal{L}_t$ , so that

$$\mathcal{L}_T \leq e^{-\lambda T} \mathcal{L}_0,$$

which is equivalent to

$$f(z_T) - \int_0^T e^{-\lambda(T-s)} \left( \frac{L_N^2}{\epsilon} \|y_s - y_0\|_2^2 + L \|y_s - y_0\|_2 \right) ds - \int_0^T e^{-\lambda(T-s)} G_s dA_s \leq e^{-\lambda T} f(z_0).$$

Observe that  $G_s$  is measurable wrt the natural filtration generated by  $A_s$ , so that  $\int_0^T e^{-\lambda(T-s)} G_s dA_s$  is a martingale. Thus taking expectations,

$$\mathbb{E}[f(z_T)] \leq e^{-\lambda T} \mathbb{E}[f(z_0)] + \int_0^T \frac{L_N^2}{\epsilon} \mathbb{E}[\|y_s - y_0\|_2^2] + L \mathbb{E}[\|y_s - y_0\|_2] ds$$

By Lemma 11,  $\mathbb{E}[\|y_t - y_0\|_2^2] \leq t^2 L^2 \mathbb{E}[\|y_0\|_2^2] + t\beta^2$ , so that

$$\begin{aligned}
 \int_0^T \frac{L_N^2}{\epsilon} \mathbb{E}[\|y_s - y_0\|_2^2] ds &\leq \frac{T^3 L_N^2 L^2}{\epsilon} \mathbb{E}[\|y_0\|_2^2] + \frac{T^2 L_N^2}{\epsilon} \beta^2 \\
 L \mathbb{E}[\|y_s - y_0\|_2] &\leq T^2 L^2 \sqrt{\mathbb{E}[\|y_0\|_2^2]} + T^{3/2} L \beta
 \end{aligned}$$

Furthermore, using our assumption in the Lemma statement that  $T \leq \min \left\{ \frac{\epsilon^2}{\beta^2}, \frac{\epsilon}{6L\sqrt{R^2 + \beta^2/m}} \right\}$  and  $\mathbb{E}[\|y_0\|_2^2] \leq 8(R^2 + \beta^2/m)$ , we can verify that

$$\begin{aligned}
 \int_0^T \frac{L_N^2}{\epsilon} \mathbb{E}[\|y_s - y_0\|_2^2] ds &\leq \frac{1}{4} T L_N^2 \epsilon + T L_N^2 \epsilon \\
 L \mathbb{E}[\|y_s - y_0\|_2] &\leq \frac{1}{2} T L \epsilon + T L \epsilon
 \end{aligned}$$

Combining the above gives

$$\mathbb{E}[f(z_T)] \leq e^{-\lambda T} \mathbb{E}[f(z_0)] + 3T(L + L_N^2)\epsilon$$

**Corollary 2** Let  $f$  be as defined in Lemma 18 with parameter  $\epsilon$  satisfying  $\epsilon \leq \frac{\mathcal{R}_q}{\alpha_q \mathcal{R}_q^2 + 1}$ .

Let  $\delta \leq \min \left\{ \frac{\epsilon^2}{\beta^2}, \frac{\epsilon}{8L\sqrt{R^2 + \beta^2/m}} \right\}$ , and let  $\bar{x}_t$  and  $\bar{y}_t$  have dynamics as defined in (3) and (2) respectively, and suppose that the initial conditions satisfy  $\mathbb{E}[\|\bar{x}_0\|_2^2] \leq R^2 + \beta^2/m$  and  $\mathbb{E}[\|\bar{y}_0\|_2^2] \leq R^2 + \beta^2/m$ . Then there exists a coupling between  $\bar{x}_t$  and  $\bar{y}_t$  such that

$$\mathbb{E}[f(\bar{x}_{i\delta} - \bar{y}_{i\delta})] \leq e^{-\lambda i\delta} \mathbb{E}[f(\bar{x}_0 - \bar{y}_0)] + \frac{6}{\lambda} (L + L_N^2)\epsilon$$

**Proof of Corollary 2**

From Lemma 7 and 8, our initial conditions imply that for all  $t$ ,  $\mathbb{E} [\|\bar{x}_t\|_2^2] \leq 6\left(R^2 + \frac{\beta^2}{m}\right)$  and  $\mathbb{E} [\|\bar{y}_{k\delta}\|_2^2] \leq 8\left(R^2 + \frac{\beta^2}{m}\right)$ .

Consider an arbitrary  $k$ , and for  $t \in [k\delta, (k+1)\delta)$ , define

$$x_t := \bar{x}_{k\delta+t} \quad \text{and} \quad y_t := \bar{y}_{k\delta+t}$$

Under this definition,  $x_t$  and  $y_t$  have dynamics described in (20) and (21). Thus the coupling in (22), which describes a coupling between  $x_t$  and  $y_t$ , equivalently describes a coupling between  $\bar{x}_t$  and  $\bar{y}_t$  over  $t \in [k\delta, (k+1)\delta)$ .

We now apply Lemma 1. Given our assumed bound on  $\delta$  and our proven bounds on  $\mathbb{E} [\|\bar{x}_t\|_2^2]$  and  $\mathbb{E} [\|\bar{y}_t\|_2^2]$ ,

$$\begin{aligned} & \mathbb{E} [f(\bar{x}_{(k+1)\delta} - \bar{y}_{(k+1)\delta})] \\ &= \mathbb{E} [f(x_\delta - y_\delta)] \\ &\leq e^{-\lambda\delta} \mathbb{E} [f(x_0 - y_0)] + 6\delta(L + L_N^2)\epsilon \\ &= e^{-\lambda\delta} \mathbb{E} [f(\bar{x}_{k\delta} - \bar{y}_{k\delta})] + 6\delta(L + L_N^2)\epsilon \end{aligned}$$

Applying the above recursively gives, for any  $i$

$$\mathbb{E} [f(\bar{x}_{i\delta} - \bar{y}_{i\delta})] \leq e^{-\lambda i\delta} \mathbb{E} [f(\bar{x}_0 - \bar{y}_0)] + \frac{6}{\lambda}(L + L_N^2)\epsilon$$

■

**A.4. Proof of Theorem 1**

For ease of reference, we re-state Theorem 1 below as Theorem 3 below. We make a minor notational change: using the letters  $\bar{x}_t$  and  $\bar{y}_t$  in Theorem 3, instead of the letters  $x_t$  and  $y_t$  in Theorem 1. This is to avoid some notation conflicts in the proof.

**Theorem 3 (Equivalent to Theorem 1)** *Let  $\bar{x}_t$  and  $\bar{y}_t$  have dynamics as defined in (3) and (2) respectively, and suppose that the initial conditions satisfy  $\mathbb{E} [\|\bar{x}_0\|_2^2] \leq R^2 + \beta^2/m$  and  $\mathbb{E} [\|\bar{y}_0\|_2^2] \leq R^2 + \beta^2/m$ . Let  $\hat{\epsilon}$  be a target accuracy satisfying  $\hat{\epsilon} \leq \left(\frac{16(L+L_N^2)}{\lambda}\right) \cdot \exp(7\alpha_q \mathcal{R}_q/3) \cdot \frac{\mathcal{R}_q}{\alpha_q \mathcal{R}_q^2 + 1}$ . Let  $\delta$  be a step size satisfying*

$$\delta \leq \min \left\{ \begin{array}{l} \frac{\lambda^2 \hat{\epsilon}^2}{512\beta^2(L^2 + L_N^4) \exp\left(\frac{14\alpha_q \mathcal{R}_q^2}{3}\right)} \\ \frac{2\lambda \hat{\epsilon}}{(L^2 + L_N^4) \exp\left(\frac{7\alpha_q \mathcal{R}_q^2}{3}\right) \sqrt{R^2 + \beta^2/m}} \end{array} \right. .$$

If we assume that  $\bar{x}_0 = \bar{y}_0$ , then there exists a coupling between  $\bar{x}_t$  and  $\bar{y}_t$  such that for any  $k$ ,

$$\mathbb{E} [\|\bar{x}_{k\delta} - \bar{y}_{k\delta}\|_2] \leq \hat{\epsilon}$$

Alternatively, if we assume  $k \geq \frac{3\alpha_q \mathcal{R}_q^2}{\delta} \log \frac{R^2 + \beta^2/m}{\hat{\epsilon}}$ , then

$$W_1(p^*, p_{k\delta}^y) \leq 2\hat{\epsilon}$$

where  $p_t^y := \text{Law}(\bar{y}_t)$ .

**Proof of Theorem 3**

Let  $\epsilon := \frac{\lambda}{16(L+L_N^2)} \exp\left(-\frac{7\alpha_q \mathcal{R}_q^2}{3}\right) \hat{\epsilon}$ . Let  $f$  be defined as in Lemma 18 with the parameter  $\epsilon$ .

$$\begin{aligned}
 & \mathbb{E} [\|\bar{x}_{i\delta} - \bar{y}_{i\delta}\|_2] \\
 & \leq 2 \exp\left(\frac{7\alpha_q \mathcal{R}_q^2}{3}\right) \mathbb{E} [f(\bar{x}_{i\delta} - \bar{y}_{i\delta})] + 2 \exp\left(\frac{7\alpha_q \mathcal{R}_q^2}{3}\right) \epsilon \\
 & \leq 2 \exp\left(\frac{7\alpha_q \mathcal{R}_q^2}{3}\right) \left( e^{-\lambda i\delta} \mathbb{E} [f(\bar{x}_0 - \bar{y}_0)] + \frac{6}{\lambda} (L + L_N^2) \epsilon \right) + 2 \exp\left(\frac{7\alpha_q \mathcal{R}_q^2}{3}\right) \epsilon \\
 & \leq 2 \exp\left(\frac{7\alpha_q \mathcal{R}_q^2}{3}\right) e^{-\lambda i\delta} \mathbb{E} [f(\bar{x}_0 - \bar{y}_0)] + \frac{16(L + L_N^2)}{\lambda} \exp\left(\frac{7\alpha_q \mathcal{R}_q^2}{3}\right) \cdot \epsilon \\
 & = 2 \exp\left(\frac{7\alpha_q \mathcal{R}_q^2}{3}\right) e^{-\lambda i\delta} \mathbb{E} [f(\bar{x}_0 - \bar{y}_0)] + \hat{\epsilon}
 \end{aligned} \tag{26}$$

where the first inequality is by item 4 of Lemma 18, the second inequality is by Corollary 2 (notice that  $\delta$  satisfies the requirement on  $T$  in Theorem 1, for the given  $\epsilon$ ). The third inequality uses the fact that  $1 \leq L/m \leq \frac{(L+L_N^2)}{\lambda}$ .

The first claim follows from substituting  $\bar{x}_0 = \bar{y}_0$  into (26), so that the first term is 0, and using the definition of  $\epsilon$ , so that the second term is 0.

For the second claim, let  $\bar{x}_0 \sim p^*$ , the invariant distribution of (3). From Lemma 7, we know that  $\bar{x}_0$  satisfies the required initial conditions in this Lemma. Continuing from (26),

$$\begin{aligned}
 & \mathbb{E} [\|\bar{x}_{i\delta} - \bar{y}_{i\delta}\|_2] \\
 & \leq 2 \exp\left(\frac{7\alpha_q \mathcal{R}_q^2}{3}\right) \left( 2e^{-\lambda i\delta} \mathbb{E} [\|\bar{x}_0\|_2^2 + \|\bar{y}_0\|_2^2] + \frac{6}{\lambda} (L + L_N^2) \epsilon \right) + \epsilon \\
 & \leq 2 \exp\left(\frac{7\alpha_q \mathcal{R}_q^2}{3}\right) (2e^{-\lambda i\delta} (R^2 + \beta^2/m)) + \frac{16}{\lambda} \exp\left(2\frac{7\alpha_q \mathcal{R}_q^2}{3}\right) (L + L_N^2) \epsilon \\
 & = 4 \exp\left(\frac{7\alpha_q \mathcal{R}_q^2}{3}\right) (e^{-\lambda i\delta} (R^2 + \beta^2/m)) + \hat{\epsilon}
 \end{aligned}$$

By our assumption that  $i \geq \frac{1}{\delta} \cdot 3\alpha_q \mathcal{R}_q^2 \log \frac{R^2 + \beta^2/m}{\hat{\epsilon}}$ , the first term is also bounded by  $\hat{\epsilon}$ , and this proves our second claim. ■

### A.5. Simulating the SDE

One can verify that the SDE in (2) can be simulated (at discrete time intervals) as follows:

$$y_{(k+1)\delta} = y_{k\delta} - \delta \nabla U(y_{k\delta}) + \sqrt{\delta} M(y_{k\delta}) \theta_k$$

Where  $\theta_k \sim \mathcal{N}(0, I)$ . This however requires access to  $M(y_{k,\delta})$ , which may be difficult to compute.

If for any  $y$ , one is able to draw samples from some distribution  $p_y$  such that

1.  $\mathbb{E}_{\xi \sim p_y} [\xi] = 0$
2.  $\mathbb{E}_{\xi \sim p_y} [\xi \xi^T] = M(y)$
3.  $\|\xi\|_2 \leq \beta$  almost surely, for some  $\beta$ .

then one might sample a noise that is  $\delta$  close to  $M(y_{k\delta})\theta_k$  through Theorem 5.

Specifically, if one draws  $n$  samples  $\xi_1 \dots \xi_n \stackrel{iid}{\sim} p_y$ , and let  $S_n := \frac{1}{\sqrt{n}} \sum_{i=1}^n \xi_i$ , Theorem 5 guarantees that  $W_2(S_n, M(y)\theta) \leq \frac{6\sqrt{d}\beta\sqrt{\log n}}{\sqrt{n}}$ . We remark that the proof of Theorem 1 can be modified to accommodate for this sampling error. The number of samples needed to achieve  $\epsilon$  accuracy will be on the order of  $n \cong O(\delta\epsilon)^{-2} = O(\epsilon^{-6})$ .

## B. Proofs for Convergence under Non-Gaussian Noise (Theorem 2)

### B.1. Proof Overview

The main proof of Theorem 2 is contained in Appendix B.4.

Here, we outline the steps of our proof:

1. In Appendix B.2, we construct a coupling between (3) and (1) over an epoch which consists of an interval  $[k\delta, (k+n)\delta]$  for some  $k$ . The coupling in (B.2) consists of four processes  $(x_t, y_t, v_t, w_t)$ , where  $y_t$  and  $v_t$  are auxiliary processes used in defining the coupling. Notably, the process  $(x_t, y_t)$  has the same distribution over the epoch as (22).
2. In Appendix B.3, we prove Lemma 3 and Lemma 4, which, combined with Lemma 1 from Appendix A.3, show that under the coupling constructed in Step 1, a Lyapunov function  $f(x_T - w_T)$  contracts exponentially with rate  $\lambda$ , plus a discretization error term. In Corollary 5, we apply the results of Lemma 1, Lemma 3 and Lemma 4 recursively over multiple steps to give a bound on  $f(x_{k\delta} - w_{k\delta})$  for all  $k$ , and for sufficiently small  $\delta$ .
3. Finally, in Appendix B.4, we prove Theorem 2 by applying the results of Corollary 5, together with the fact that  $f(z)$  upper bounds  $\|z\|_2$  up to a constant.

## B.2. Constructing a Coupling

In this subsection, we construct a coupling between (1) and (3), given arbitrary initialization  $(x_0, w_0)$ . We will consider a finite time  $T = n\delta$ , which we will refer to as an *epoch*.

1. Let  $V_t$  and  $W_t$  be two independent Brownian motion.
2. Using  $V_t$  and  $W_t$ , define

$$x_t = x_0 + \int_0^t -\nabla U(x_s) ds + \int_0^t c_m dV_s + \int_0^t N(w_0) dW_s \quad (27)$$

3. Using the same  $V_t$  and  $W_t$  in (27), we will define  $y_t$  as

$$y_t = w_0 + \int_0^t -\nabla U(w_0) ds + \int_0^t c_m (I - 2\gamma_s \gamma_s^t) dV_s + \int_0^t N(x_s) dW_s \quad (28)$$

Where  $\gamma_t := \frac{x_t - y_t}{\|x_t - y_t\|_2} \cdot \mathbb{1}\{\|x_t - y_t\|_2 \in [2\epsilon, \mathcal{R}_q]\}$ . The coupling  $(x_t, y_t)$  defined in (27) and (28) is identical to the coupling in (22) (with  $y_0 = w_0$ ).

4. We now define a process  $v_{k\delta}$  for  $k = 0 \dots n$ :

$$v_{k\delta} = w_0 + \sum_{i=0}^{k-1} -\delta \nabla U(w_0) + \sqrt{\delta} \sum_{i=0}^{k-1} \xi(w_0, \eta_i) \quad (29)$$

where marginally, the variables  $(\eta_0 \dots \eta_{n-1})$  are drawn *i.i.d* from the same distribution as in (1).

Notice that  $y_T - w_0 - T\nabla U(w_0) = \int_0^T c_m dB_t + \int_0^T N(w_0) dW_t$ , so that  $\text{Law}(y_T - w_0 - T\nabla U(w_0)) = \mathcal{N}(0, TM(w_0)^2)$ . Notice also that  $v_T - w_0 - T\nabla U(w_0) = \sqrt{\delta} \sum_{i=0}^{n-1} \xi(w_0, \eta_i)$ . By Corollary 24,  $W_2(y_T - w_0 - T\nabla U(w_0), v_T - w_0 - T\nabla U(w_0)) = 6\sqrt{d\delta}\beta\sqrt{\log n}$ . Let the joint distribution between (29) and (28) be the one induced by the optimal coupling between  $y_T - w_0 - T\nabla U(w_0)$  and  $v_T - w_0 - T\nabla U(w_0)$ , so that

$$\begin{aligned} & \sqrt{\mathbb{E} \left[ \|y_T - v_T\|_2^2 \right]} \\ &= \sqrt{\mathbb{E} \left[ \|y_T - T\nabla U(w_0) - v_T + T\nabla U(w_0)\|_2^2 \right]} \\ &= W_2(y_T - w_0 - T\nabla U(w_0), v_T - w_0 - T\nabla U(w_0)) \\ &\leq 6\sqrt{d\delta}\beta\sqrt{\log n} \end{aligned} \quad (30)$$

where the last inequality is by Corollary 24.

5. Given the sequence  $(\eta_0 \dots \eta_{n-1})$  from (29), we can define

$$w_{k\delta} = w_0 + \sum_{i=0}^{k-1} -\delta \nabla U(w_{i\delta}) + \sqrt{\delta} \sum_{i=0}^{k-1} \xi(w_{i\delta}, \eta_i) \quad (31)$$



specifically,  $(w_0 \dots w_{n\delta})$  in (31) and  $(v_0 \dots v_{n\delta})$  in (29) are coupled through the shared  $(\eta_0 \dots \eta_{n-1})$  variables.

For convenience, we will let  $v_t := v_{i\delta}$  and  $w_t := w_{i\delta}$ , where  $i$  is the unique integer satisfying  $t \in [i\delta, (i+1)\delta)$ .

We can verify that, marginally, the process  $x_t$  in (27) has the same distribution as (3), using the proof as Lemma 6. It is also straightforward to verify that  $w_{k\delta}$ , as defined in (31), has the same marginal distribution as (1), due to the definition of  $\eta_i$  in (29).

### B.3. One Epoch Contraction

In Lemma 3, we prove a discretization error bound between  $f(x_T - y_T)$  and  $f(x_T - v_T)$ , for the coupling defined in (27), (28) and (29).

In Lemma 4, we prove a discretization error bound between  $f(x_T - v_T)$  and  $f(x_T - w_T)$ , for the coupling defined in (27), (29) and (31).

**Lemma 3** *Let  $f$  be as defined in Lemma 18 with parameter  $\epsilon$  satisfying  $\epsilon \leq \frac{\mathcal{R}_q}{\alpha_q \mathcal{R}_q^2 + 1}$ . Let  $x_t, y_t$  and  $v_t$  be as defined in (27), (28), (29). Let  $n$  be any integer and  $\delta$  be any step size, and let  $T := n\delta$ .*

*If  $\mathbb{E}[\|x_0\|_2^2] \leq 8(R^2 + \beta^2/m)$ ,  $\mathbb{E}[\|y_0\|_2^2] \leq 8(R^2 + \beta^2/m)$  and  $T \leq \min\left\{\frac{1}{16L}, \frac{\beta^2}{8L^2(R^2 + \beta^2/m)}\right\}$  and*

$$\delta \leq \min \left\{ \frac{T\epsilon^2 L}{36d\beta^2 \log\left(\frac{36d\beta^2}{\epsilon^2 L}\right)}, \frac{T\epsilon^4 L^2}{2^{14}d\beta^4 \log\left(\frac{2^{14}d\beta^4}{\epsilon^4 L^2}\right)} \right\}$$

*Then*

$$\mathbb{E}[f(x_T - v_T)] - \mathbb{E}[f(x_T - y_T)] \leq 4TL\epsilon$$

#### Proof

By Taylor's Theorem,

$$\begin{aligned} & \mathbb{E}[f(x_T - v_T)] \\ = & \mathbb{E} \left[ f(x_T - y_T) + \langle \nabla f(x_T - y_T), y_T - v_T \rangle + \int_0^1 \int_0^s \langle \nabla^2 f(x_T - y_T + s(y_T - v_T)), (y_T - v_T)(y_T - v_T)^T \rangle ds dt \right] \\ = & \mathbb{E} \left[ \underbrace{f(x_T - y_T) + \langle \nabla f(x_0 - y_0), y_T - v_T \rangle}_{\textcircled{1}} + \underbrace{\langle \nabla f(x_T - y_T) - \nabla f(x_0 - y_0), y_T - v_T \rangle}_{\textcircled{2}} \right] \\ & + \mathbb{E} \left[ \underbrace{\int_0^1 \int_0^s \langle \nabla^2 f(x_T - y_T + s(y_T - v_T)), (y_T - v_T)(y_T - v_T)^T \rangle ds dt}_{\textcircled{3}} \right] \end{aligned}$$

We will bound each of the terms above separately.

$$\begin{aligned} & \mathbb{E}[\textcircled{1}] \\ = & \mathbb{E}[\langle \nabla f(x_0 - y_0), y_T - v_T \rangle] \\ = & \mathbb{E} \left[ \left\langle \nabla f(x_0 - y_0), n\delta \nabla U(y_0) - n\delta \nabla U(v_0) + \int_0^T -\nabla U(w_0) dt + \int_0^T c_m dV_t + \int_0^T N(w_0) dW_t + \sum_{i=0}^{n-1} \sqrt{\delta} \xi(v_0, \eta_i) \right\rangle \right] \\ = & \mathbb{E}[\langle \nabla f(x_0 - y_0), n\delta \nabla U(y_0) - n\delta \nabla U(v_0) \rangle] \\ = & 0 \end{aligned}$$

where the third equality is because  $\int_0^T dB_t$ ,  $\int_0^T dW_t$  and  $\sum_{k=1}^T \xi(v_0, \eta_i)$  have zero mean conditioned on the information at time 0, and the fourth equality is because  $y_0 = v_0$  by definition in (28) and (29).

$$\begin{aligned}
 & \mathbb{E} \left[ \textcircled{2} \right] \\
 &= \mathbb{E} \left[ \langle \nabla f(x_T - y_T) - \nabla f(x_0 - y_0), y_T - v_T \rangle \right] \\
 &\leq \sqrt{\mathbb{E} \left[ \|\nabla f(x_T - y_T) - \nabla f(x_0 - y_0)\|_2^2 \right]} \sqrt{\mathbb{E} \left[ \|y_T - v_T\|_2^2 \right]} \\
 &\leq \frac{2}{\epsilon} \sqrt{2\mathbb{E} \left[ \|x_T - x_0\|_2^2 + \|y_T - y_0\|_2^2 \right]} \sqrt{\mathbb{E} \left[ \|y_T - v_T\|_2^2 \right]} \\
 &\leq \frac{2}{\epsilon} \sqrt{(32T\beta^2 + 4T\beta^2)} \cdot \left( 6\sqrt{d\delta}\beta \log n \right) \\
 &\leq \frac{128}{\epsilon} \sqrt{T}\beta^2 \cdot \left( \sqrt{d\delta}\log n \right)
 \end{aligned}$$

Where the second inequality is by  $\|\nabla^2 f\|_2 \leq \frac{2}{\epsilon}$  from item 2(c) of Lemma 18 and Young's inequality. The third inequality is by Lemma 10 and Lemma 11 and (30).

Finally, we can bound

$$\begin{aligned}
 & \mathbb{E} \left[ \textcircled{3} \right] \\
 &\leq \int_0^1 \int_0^s \mathbb{E} \left[ \|\nabla^2 f(x_T - y_T + s(y_T - v_T))\|_2 \|y_T - v_T\|_2^2 \right] ds dt \\
 &\leq \frac{2}{\epsilon} \mathbb{E} \left[ \|y_T - v_T\|_2^2 \right] \\
 &\leq \frac{72d\delta\beta^2 \log^2 n}{\epsilon}
 \end{aligned}$$

Where the second inequality is by  $\|\nabla^2 f\|_2 \leq \frac{2}{\epsilon}$  from item 2(c) of Lemma 18, the third inequality is by (30).

Summing these 3 terms,

$$\begin{aligned}
 & \mathbb{E} [f(x_T - v_T) - f(x_T - y_T)] \\
 &\leq \frac{128}{\epsilon} \sqrt{T}\beta^2 \cdot \left( \sqrt{d\delta}\sqrt{\log n} \right) + \frac{36d\delta\beta^2 \log n}{\epsilon} \\
 &= \frac{128}{\epsilon} \sqrt{T}\beta^2 \cdot \left( \sqrt{d\delta}\sqrt{\log \frac{T}{\delta}} \right) + \frac{36d\delta\beta^2 \log \frac{T}{\delta}}{\epsilon}
 \end{aligned}$$

Let us bound the first term. We apply Lemma 25 (with  $x = \frac{T}{\delta}$  and  $c = \frac{\epsilon^4}{2^{14}d\beta^4}$ ), which shows that

$$\frac{T}{\delta} \geq \frac{2^{14}d\beta^4}{\epsilon^4} \log \left( \frac{2^{14}d\beta^4}{\epsilon^4 L^2} \right) \Rightarrow \frac{T}{\delta} \frac{1}{\log \frac{T}{\delta}} \geq \frac{2^{14}d\beta^4}{\epsilon^4 L^2} \Leftrightarrow \frac{128}{\epsilon} \sqrt{T}\beta^2 \cdot \left( \sqrt{d\delta}\log \frac{T}{\delta} \right) \leq TL\epsilon$$

For the second term, we can again apply Lemma 25 ( $x = \frac{T}{\delta}$  and  $c = \frac{\epsilon^2 L}{36d\beta^2}$ ), which shows that

$$\frac{T}{\delta} \geq \frac{36d\beta^2}{\epsilon^2 L} \log \left( \frac{36d\beta^2}{\epsilon^2 L} \right) \Rightarrow \frac{T}{\delta} \frac{1}{\log \frac{T}{\delta}} \geq \frac{36d\beta^2}{\epsilon^2 L} \Rightarrow \frac{36d\delta\beta^2 \log \frac{T}{\delta}}{\epsilon} \leq TL\epsilon$$

The above imply that

$$\mathbb{E} [f(x_T - v_T) - f(x_T - y_T)] \leq 2TL\epsilon$$

■

**Lemma 4** Let  $f$  be as defined in Lemma 18 with parameter  $\epsilon$  satisfying  $\epsilon \leq \frac{\mathcal{R}_q}{\alpha_q \mathcal{R}_q^{2+1}}$ . Let  $x_t, v_t$  and  $w_t$  be as defined in (27), (29), (31). Let  $n$  be an integer and  $\delta$  be a step size, and let  $T := n\delta$ .

If we assume that  $\mathbb{E}[\|x_0\|_2^2]$ ,  $\mathbb{E}[\|v_0\|_2^2]$ , and  $\mathbb{E}[\|w_0\|_2^2]$  are each upper bounded by  $8(R^2 + \beta^2/m)$  and that  $T \leq \min\left\{\frac{1}{16L}, \frac{\epsilon}{32\sqrt{L}\beta}, \frac{\epsilon^2}{128\beta^2}, \frac{\epsilon^4 L_N^2}{2^{14}\beta^2 c_m^2}\right\}$ , then

$$\mathbb{E}[f(x_T - w_T)] - \mathbb{E}[f(x_T - v_T)] \leq 4T(L + L_N^2)\epsilon$$

**Remark 9** For sufficiently small  $\epsilon$ , our assumption on  $T$  boils down to  $T = o(\epsilon^4)$

### Proof

First, we can verify using Taylor's theorem that for any  $x, y$ ,

$$f(y) = f(x) + \langle \nabla f(x), y - x \rangle + \int_0^1 \int_0^s \langle \nabla^2 f(x + s(y-x)), (y-x)(y-x)^T \rangle ds dt \quad (32)$$

$$\nabla f(y) = \nabla f(x) + \langle \nabla^2 f(x), y - x \rangle + \int_0^1 \int_0^s \langle \nabla^3 f(x + s(y-x)), (y-x)(y-x)^T \rangle ds dt \quad (33)$$

Thus

$$\begin{aligned} & \mathbb{E}[f(x_T - w_T)] \\ = & \mathbb{E}\left[ f(x_T - v_T) + \langle \nabla f(x_T - v_T), v_T - w_T \rangle + \int_0^1 \int_0^s \langle \nabla^2 f(x_T - v_T + s(v_T - w_T)), (v_T - w_T)(v_T - w_T)^T \rangle ds dt \right] \\ = & \mathbb{E}\left[ \underbrace{f(x_T - v_T) + \langle \nabla f(x_0 - v_0), v_T - w_T \rangle}_{\textcircled{1}} + \underbrace{\langle \nabla f(x_T - v_T) - \nabla f(x_0 - v_0), v_T - w_T \rangle}_{\textcircled{2}} \right] \\ & + \mathbb{E}\left[ \underbrace{\int_0^1 \int_0^s \langle \nabla^2 f(x_T - v_T + s(v_T - w_T)), (v_T - w_T)(v_T - w_T)^T \rangle ds dt}_{\textcircled{3}} \right] \end{aligned}$$

Recall from (29) and (31) that

$$\begin{aligned} v_{n\delta} &= w_0 + \sum_{i=0}^{n-1} \delta \nabla U(w_i) + \sqrt{\delta} \sum_{i=0}^{n-1} \xi(w_i, \eta_i) \\ w_{n\delta} &= w_0 + \sum_{i=0}^{n-1} \delta \nabla U(w_{i\delta}) + \sqrt{\delta} \sum_{i=0}^{n-1} \xi(w_{i\delta}, \eta_i) \end{aligned}$$

Note that conditioned on the randomness up to time 0,  $\mathbb{E} \left[ \sum_{i=0}^{n-1} \xi(w_0, \eta_i) \right] = \mathbb{E} \left[ \sum_{i=0}^{n-1} \xi(w_{i\delta}, \eta_i) \right] = 0$ , so that

$$\begin{aligned}
 & \mathbb{E} \left[ \textcircled{1} \right] \\
 &= \mathbb{E} [\langle \nabla f(x_0 - v_0), v_T - w_T \rangle] \\
 &= \delta \mathbb{E} \left[ \left\langle \nabla f(x_0 - v_0), \sum_{i=0}^{n-1} \nabla U(w_0) - \nabla U(w_{i\delta}) \right\rangle \right] + \sqrt{\delta} \mathbb{E} \left[ \left\langle \nabla f(x_0 - v_0), \sum_{i=0}^{n-1} \xi(w_0, \eta_i) - \sum_{i=0}^{n-1} \xi(w_{i\delta}, \eta_i) \right\rangle \right] \\
 &= \delta \mathbb{E} \left[ \left\langle \nabla f(x_0 - v_0), \sum_{i=0}^{n-1} \nabla U(w_0) - \nabla U(w_{i\delta}) \right\rangle \right] \\
 &\leq \delta \sum_{i=0}^{n-1} L \mathbb{E} [\|w_0 - w_{i\delta}\|_2] \\
 &\leq TL \sqrt{32T\beta^2} \leq 8T^{3/2} L\beta
 \end{aligned}$$

where the third equality is because  $\xi(\cdot, \eta_i)$  has 0 mean conditioned on the randomness at time 0, and the second inequality is by Lemma 13.

Next,

$$\begin{aligned}
 & \mathbb{E} \left[ \textcircled{2} \right] \\
 &= \mathbb{E} [\langle \nabla f(x_T - v_T) - \nabla f(x_0 - v_0), v_T - w_T \rangle] \\
 &\leq \mathbb{E} [\|\nabla f(x_T - v_T) - \nabla f(x_0 - v_0)\|_2 \|v_T - w_T\|] \\
 &\leq \frac{4}{\epsilon} \sqrt{\mathbb{E} [\|x_T - x_0\|_2^2 + \|v_T - v_0\|_2^2]} \cdot \sqrt{\mathbb{E} [\|v_T - w_T\|_2^2]} \\
 &\leq \frac{4}{\epsilon} \sqrt{16T\beta^2 + 2T\beta^2} \cdot \sqrt{32(T^2L^2 + TL_\xi^2)T\beta^2} \\
 &\leq \frac{128}{\epsilon} T\beta^2 (\sqrt{T}L_\xi + TL)
 \end{aligned}$$

where the second inequality is because  $\|\nabla^2 f\|_2 \leq \frac{2}{\epsilon}$  from item 2(c) of Lemma 18 and by Young's inequality. The third inequality is by Lemma 10, Lemma 12 and Lemma 14.

Finally,

$$\begin{aligned}
 & \mathbb{E} \left[ \textcircled{3} \right] \\
 &= \mathbb{E} \left[ \int_0^1 \int_0^s \langle \nabla^2 f(x_T - v_T + s(v_T - w_T)), (v_T - w_T)(v_T - w_T)^T \rangle ds dt \right] \\
 &\leq \int_0^1 \int_0^s \mathbb{E} [\|\nabla^2 f(x_T - v_T + s(v_T - w_T))\|_2 \|v_T - w_T\|_2^2] ds \\
 &\leq \frac{1}{\epsilon} \mathbb{E} [\|v_T - w_T\|_2^2] \\
 &\leq \frac{32}{\epsilon} (T^2L^2 + TL_\xi^2) T\beta^2
 \end{aligned}$$

where the second inequality is because  $\|\nabla^2 f\|_2 \leq \frac{2}{\epsilon}$  from item 2(c) of Lemma 18 and by Young's inequality. The third inequality is by Lemma 14.

Summing the above,

$$\begin{aligned}
 & \mathbb{E} [f(x_T - w_T) - f(x_T - v_T)] \\
 &\leq 8T^{3/2} L\beta + \frac{128}{\epsilon} T\beta^2 (\sqrt{T}L_\xi + TL) + \frac{32}{\epsilon} (T^2L^2 + TL_\xi^2) T\beta^2 \\
 &\leq T^{3/2} \epsilon
 \end{aligned}$$

where the last inequality is by our assumption on  $T$ , specifically,

$$\begin{aligned}
 T &\leq \frac{\epsilon^2}{128\beta^2} \Rightarrow T^{3/2}L\beta \leq TL\epsilon \\
 T &\leq \frac{\epsilon^2}{128\beta^2} \Rightarrow \frac{128}{\epsilon}T^2L\beta^2 \leq TL\epsilon \\
 T &\leq \frac{\epsilon}{32\sqrt{L}\beta} \Rightarrow \frac{32}{\epsilon}(T^3L^2\beta^2) \leq TL\epsilon \\
 T &\leq \frac{\epsilon^4L_N^2}{2^{14}\beta^2c_m^2} \Rightarrow \frac{128}{\epsilon}T^{3/2}\beta^2L\xi \leq TL_N^2\epsilon \\
 T &\leq \frac{\epsilon^2}{128\beta^2} \Rightarrow T \leq \frac{\epsilon^2}{128c_m^2} \Rightarrow \frac{32}{\epsilon}T^2L\xi^2\beta^2 \leq TL_N^2\epsilon
 \end{aligned}$$

where the last line uses the fact that  $\beta \geq c_m^2$ . ■

**Corollary 5** Let  $f$  be as defined in Lemma 18 with parameter  $\epsilon$  satisfying  $\epsilon \leq \frac{\mathcal{R}_q}{\alpha_q \mathcal{R}_q^2 + 1}$ .

Let  $T = \min \left\{ \frac{1}{16L}, \frac{\beta^2}{8L^2(R^2 + \beta^2/m)}, \frac{\epsilon}{32\sqrt{L}\beta}, \frac{\epsilon^2}{128\beta^2}, \frac{\epsilon^4L_N^2}{2^{14}\beta^2c_m^2} \right\}$  and let  $\delta \leq \min \left\{ \frac{T\epsilon^2L}{36d\beta^2 \log \left( \frac{36d\beta^2}{\epsilon^2L} \right)}, \frac{T\epsilon^4L^2}{2^{14}d\beta^4 \log \left( \frac{2^{14}d\beta^4}{\epsilon^4L^2} \right)} \right\}$ ,

assume additionally that  $n = T/\delta$  is an integer.

Let  $\bar{x}_t$  and  $\bar{w}_t$  have dynamics as defined in (3) and (2) respectively, and suppose that the initial conditions satisfy  $\mathbb{E} [\|\bar{x}_0\|_2^2] \leq R^2 + \beta^2/m$  and  $\mathbb{E} [\|\bar{w}_0\|_2^2] \leq R^2 + \beta^2/m$ . Then there exists a coupling between  $\bar{x}_t$  and  $\bar{w}_t$  such that

$$\mathbb{E} [f(\bar{x}_{i\delta} - \bar{w}_{i\delta})] \leq e^{-\lambda i\delta} \mathbb{E} [f(\bar{x}_0 - \bar{w}_0)] + \frac{6}{\lambda} (L + L_N^2)\epsilon$$

**Proof**

From Lemma 7 and 9, our initial conditions imply that for all  $t$ ,  $\mathbb{E} [\|\bar{x}_t\|_2^2] \leq 6\left(R^2 + \frac{\beta^2}{m}\right)$  and  $\mathbb{E} [\|\bar{w}_{k\delta}\|_2^2] \leq 8\left(R^2 + \frac{\beta^2}{m}\right)$ .

Consider an arbitrary  $k$ , and for  $t \in [0, T]$ , define

$$x_t := \bar{x}_{kT+t} \quad \text{and} \quad w_t := \bar{w}_{kT+t} \tag{34}$$

Notice that as described above,  $x_t$  and  $w_t$  have dynamics described in (3) and (1). Let  $x_t, w_t$  have joint distribution as described in (27) and (31), and let  $(y_t, v_t)$  be the processes defined in (28) and (29). Notice that the joint distribution between  $x_t$  and  $w_t$  equivalently describes a coupling between  $\bar{x}_t$  and  $\bar{w}_t$  over  $t \in [kT, (k+1)T]$ .

First, notice that the processes (27) and (28) have the same distribution as (22). We can thus apply Lemma 1:

$$\mathbb{E} [f(x_T - y_T)] \leq e^{-\lambda T} \mathbb{E} [f(x_0 - y_0)] + 6T(L + L_N^2)\epsilon$$

By Lemma 3,

$$\mathbb{E} [f(x_T - v_T)] - \mathbb{E} [f(x_T - y_T)] \leq 4TL\epsilon$$

By Lemma 4,

$$\mathbb{E} [f(x_T - w_T)] - \mathbb{E} [f(x_T - v_T)] \leq 4T(L + L_N^2)\epsilon$$

Summing the above three equations,

$$\mathbb{E} [f(x_T - w_T)] \leq e^{-\lambda T} \mathbb{E} [f(x_0 - w_0)] + 14T(L + L_N^2)\epsilon$$

Where we use the fact that  $y_0 = w_0$  by construction in (28).

Recalling (34), this is equivalent to

$$\mathbb{E} [f(\bar{x}_{(k+1)T} - \bar{w}_{(k+1)T})] \leq e^{-\lambda\delta} \mathbb{E} [f(\bar{x}_{kT} - \bar{w}_{kT})] + 14T(L + L_N^2)$$

Applying the above recursively gives, for any  $i$

$$\mathbb{E} [f(\bar{x}_{iT} - \bar{w}_{iT})] \leq e^{-\lambda iT} \mathbb{E} [f(\bar{x}_0 - \bar{w}_0)] + \frac{14}{\lambda} (L + L_N^2) \epsilon$$

■

#### B.4. Proof of Theorem 2

For ease of reference, we re-state Theorem 2 below as Theorem 4 below. We make a minor notational change: using the letters  $\bar{x}_t$  and  $\bar{y}_t$  in Theorem 4, instead of the letters  $x_t$  and  $y_t$  in Theorem 2. This is to avoid some notation conflicts in the proof.

**Theorem 4 (Equivalent to Theorem 2)** *Let  $\bar{x}_t$  and  $w_t$  have dynamics as defined in (3) and (1) respectively, and suppose that the initial conditions satisfy  $\mathbb{E} [\|\bar{x}_0\|_2^2] \leq R^2 + \beta^2/m$  and  $\mathbb{E} [\|\bar{w}_0\|_2^2] \leq R^2 + \beta^2/m$ . Let  $\hat{\epsilon}$  be a target accuracy satisfying  $\hat{\epsilon} \leq \left(\frac{16(L+L_N^2)}{\lambda}\right) \cdot \exp(7\alpha_q \mathcal{R}_q/3) \cdot \frac{\mathcal{R}_q}{\alpha_q \mathcal{R}_q^2 + 1}$ . Let  $\epsilon := \frac{\lambda}{16(L+L_N^2)} \exp\left(-\frac{7\alpha_q \mathcal{R}_q^2}{3}\right) \hat{\epsilon}$ . Let  $T := \min \left\{ \frac{1}{16L}, \frac{\beta^2}{8L^2(R^2 + \beta^2/m)}, \frac{\epsilon}{32\sqrt{L}\beta}, \frac{\epsilon^2}{128\beta^2}, \frac{\epsilon^4 L_N^2}{2^{14}\beta^2 c_m^2} \right\}$  and let  $\delta$  be a step size satisfying*

$$\delta \leq \min \left\{ \frac{T\epsilon^2 L}{36d\beta^2 \log\left(\frac{36d\beta^2}{\epsilon^2 L}\right)}, \frac{T\epsilon^4 L^2}{2^{14}d\beta^4 \log\left(\frac{2^{14}d\beta^4}{\epsilon^4 L^2}\right)} \right\}.$$

If we assume that  $\bar{x}_0 = \bar{w}_0$ , then there exists a coupling between  $\bar{x}_t$  and  $\bar{w}_t$  such that for any  $k$ ,

$$\mathbb{E} [\|\bar{x}_{k\delta} - \bar{w}_{k\delta}\|_2] \leq \hat{\epsilon}.$$

Alternatively, if we assume that  $k \geq \frac{3\alpha_q \mathcal{R}_q^2}{\delta} \cdot \log \frac{R^2 + \beta^2/m}{\hat{\epsilon}}$ , then

$$W_1(p^*, p_{k\delta}^w) \leq 2\hat{\epsilon},$$

where  $p_t^w := \text{Law}(\bar{w}_t)$ .

#### Proof of Theorem 4

Let  $f$  be defined as in Lemma 18 with parameter  $\epsilon$ .

$$\begin{aligned} & \mathbb{E} [\|\bar{x}_{i\delta} - \bar{w}_{i\delta}\|_2] \\ & \leq 2 \exp\left(\frac{7\alpha_q \mathcal{R}_q^2}{3}\right) \mathbb{E} [f(\bar{x}_{i\delta} - \bar{w}_{i\delta})] + 2 \exp\left(\frac{7\alpha_q \mathcal{R}_q^2}{3}\right) \epsilon \\ & \leq 2 \exp\left(\frac{7\alpha_q \mathcal{R}_q^2}{3}\right) \left( e^{-\lambda i\delta} \mathbb{E} [f(\bar{x}_0 - \bar{w}_0)] + \frac{6}{\lambda} (L + L_N^2) \epsilon \right) + 2 \exp\left(\frac{7\alpha_q \mathcal{R}_q^2}{3}\right) \epsilon \\ & \leq 2 \exp\left(\frac{7\alpha_q \mathcal{R}_q^2}{3}\right) e^{-\lambda i\delta} \mathbb{E} [f(\bar{x}_0 - \bar{w}_0)] + \frac{16(L + L_N^2)}{\lambda} \exp\left(\frac{7\alpha_q \mathcal{R}_q^2}{3}\right) \cdot \epsilon \\ & = 2 \exp\left(\frac{7\alpha_q \mathcal{R}_q^2}{3}\right) e^{-\lambda i\delta} \mathbb{E} [f(\bar{x}_0 - \bar{w}_0)] + \hat{\epsilon} \end{aligned} \tag{35}$$

where the first inequality is by item 4 of Lemma 18, the second inequality is by Corollary 5 (notice that  $\delta$  satisfies the requirement on  $T$  in Theorem 1, for the given  $\epsilon$ ). The third inequality uses the fact that  $1 \leq L/m \leq \frac{(L+L_N^2)}{\lambda}$ .

The first claim follows from substituting  $\bar{x}_0 = \bar{w}_0$  into (35), so that the first term is 0, and using the definition of  $\epsilon$ , so that the second term is 0.

For the second claim, let  $\bar{x}_0 \sim p^*$ , the invariant distribution of (3). From Lemma 7, we know that  $\bar{x}_0$  satisfies the required initial conditions in this Lemma. Continuing from (35),

$$\begin{aligned} & \mathbb{E} [\|\bar{x}_{i\delta} - \bar{w}_{i\delta}\|_2] \\ & \leq 2 \exp\left(\frac{7\alpha_q \mathcal{R}_q^2}{3}\right) \left(2e^{-\lambda i\delta} \mathbb{E} [\|\bar{x}_0\|_2^2 + \|\bar{w}_0\|_2^2] + \frac{6}{\lambda} (L + L_N^2) \epsilon\right) + \epsilon \\ & \leq 2 \exp\left(\frac{7\alpha_q \mathcal{R}_q^2}{3}\right) (2e^{-\lambda i\delta} (R^2 + \beta^2/m)) + \frac{16}{\lambda} \exp\left(\frac{7\alpha_q \mathcal{R}_q^2}{3}\right) (L + L_N^2) \epsilon \\ & = 4 \exp\left(\frac{7\alpha_q \mathcal{R}_q^2}{3}\right) (e^{-\lambda i\delta} (R^2 + \beta^2/m)) + \hat{\epsilon} \end{aligned}$$

By our assumption that  $i \geq \frac{1}{\delta} \cdot 3\alpha_q \mathcal{R}_q^2 \log \frac{R^2 + \beta^2/m}{\hat{\epsilon}}$ , the first term is also bounded by  $\hat{\epsilon}$ , and this proves our second claim.  $\blacksquare$

### C. Coupling Properties

**Lemma 6** Consider the coupled  $(x_t, y_t)$  in (22). Let  $p_t$  denote the distribution of  $x_t$ , and  $q_t$  denote the distribution of  $y_t$ . Let  $p'_t$  and  $q'_t$  denote the distributions of (20) and (21).

If  $p_0 = p'_0$  and  $q_0 = q'_0$ , then  $p_t = p'_t$  and  $q_t = q'_t$  for all  $t$ .

#### Proof

Consider the coupling in (22), reproduced below for ease of reference:

$$\begin{aligned} x_t &= x_0 + \int_0^t -\nabla U(x_s) ds + \int_0^t c_m dV_s + \int_0^t N(x_s) dW_s \\ y_t &= y_0 + \int_0^t -\nabla U(y_s) dt + \int_0^t c_m (I - 2\gamma_s \gamma_s^T) dV_s + \int_0^t N(y_s) dW_s \end{aligned}$$

Let us define the stochastic process  $A_t := \int_0^t M(x_s)^{-1} c_m dV_s + \int_0^t M(x_s)^{-1} N(x_s) dW_s$ . We can verify using Levy's characterization that  $A_t$  is a standard Brownian motion: first, since  $V_t$  and  $W_t$  are Brownian motions, and  $N(x)$  is differentiable with bounded derivatives, we know that  $A_t$  has continuous sample paths. We now verify that  $A_t^i A_t^j - \mathbb{1}\{i=j\}t$  is a martingale.

Notice that  $dA_t = c_m dV_t + M(x_s)^{-1} N(x_s) dW_s$ . Then

$$\begin{aligned} dA_t^i A_t^j &= dA_t^T (e_i e_j^T) A_t \\ &= A_t (e_i e_j^T) (c_m dV_t + M(x_s)^{-1} N(x_s) dW_s)^T + (c_m dV_t + M(x_s)^{-1} N(x_s) dW_s) (e_j e_i^T) A_t^T \\ &\quad + \frac{1}{2} \text{tr}((e_i e_j^T + e_j e_i^T) (c_m^2 M(x_s)^{-2} + M(x_s)^{-1} N(x_s)^2 M(x_s)^{-1})) dt \end{aligned}$$

where the second inequality is by Ito's Lemma applied to  $f(A_t) = A_t^T e_j e_j^T A_t$ . Taking expectations,

$$\begin{aligned} d\mathbb{E} [A_t^i A_t^j] &= \mathbb{E} \left[ \frac{1}{2} \text{tr}((e_i e_j^T + e_j e_i^T) (c_m^2 M(x_s)^{-2} + M(x_s)^{-1} N(x_s) N(x_s)^T (M(x_s)^{-1})^T)) \right] dt \\ &= \mathbb{E} \left[ \frac{1}{2} \text{tr}((e_i e_j^T + e_j e_i^T) (M(x_s)^{-1} (c_m^2 I + N(x_s)^2) M(x_s)^{-1})) \right] dt \\ &= \mathbb{E} \left[ \frac{1}{2} \text{tr}((e_i e_j^T + e_j e_i^T) (M(x_s)^{-1} (M(x_s)^2) M(x_s)^{-1})) \right] dt \\ &= \mathbb{E} \left[ \frac{1}{2} \text{tr}((e_i e_j^T + e_j e_i^T)) \right] dt \\ &= \mathbb{1}\{i=j\} dt \end{aligned}$$

This verifies that  $A_t^i A_t^j - \mathbb{1}\{i=j\}t$  is a martingale, and hence by Levy's characterization,  $A_t$  is a standard Brownian motion. In turn, we verify that by definition of  $A_t$ ,

$$\begin{aligned} x_t &= x_0 + \int_0^t -\nabla U(x_s) ds + \int_0^t c_m dV_s + \int_0^t N(x_s) dW_s \\ &= x_0 + \int_0^t -\nabla U(x_s) ds + \int_0^t M(x_s) (M(x_s)^{-1} (c_m dV_s + N(x_s) dW_s)) \\ &= x_0 + \int_0^t -\nabla U(x_s) ds + \int_0^t M(x_s) dA_s \end{aligned}$$

Since we showed that  $A_t$  is a standard Brownian motion, we verify that  $x_t$  as defined in (22) has the same distribution as (3).

On the other hand, we can verify that  $A'_t := \int_0^T (I - 2\gamma_s \gamma_s^T) V_s$  is a standard Brownian motion by the reflection principle. Thus

$$\int_0^t c_m (I - 2\gamma_s \gamma_s^T) dV_s + \int_0^t N(y_0) dW_s \sim \mathcal{N}(0, (c_m^2 I + N(y_0)^2)) = \mathcal{N}(0, M(y_0)^2)$$

where the equality is by definition of  $N$  in (6).

It follows immediately that  $y_t$  in (22) has the same distribution as  $y_t$  in (2). ■

### C.1. Energy Bounds

**Lemma 7** Consider  $x_t$  as defined in (3). If  $x_0$  satisfies  $\mathbb{E} [\|x_0\|_2^2] \leq R^2 + \frac{\beta^2}{m}$ , then Then for all  $t$ ,

$$\mathbb{E} [\|x_t\|_2^2] \leq 6 \left( R^2 + \frac{\beta^2}{m} \right)$$

We can also show that

$$\mathbb{E}_{p^*} [\|x\|_2^2] \leq 4 \left( R^2 + \frac{\beta^2}{m} \right)$$

#### Proof

We consider the potential function  $a(x) = (\|x\|_2 - R)_+^2$ . We verify that

$$\begin{aligned} \nabla a(x) &= (\|x\|_2 - R)_+ \frac{x}{\|x\|_2} \\ \nabla^2 a(x) &= \mathbb{1}\{\|x\|_2 \geq R\} \frac{xx^T}{\|x\|_2^2} + \frac{(\|x\|_2 - R)_+}{\|x\|_2} \left( I - \frac{xx^T}{\|x\|_2^2} \right) \end{aligned}$$

Observe that

1.  $\|\nabla^2 a(x)\|_2 \leq 2 \mathbb{1}\{\|x\|_2 \geq R\} \leq 2$
2.  $\langle \nabla a(x), -\nabla U(x) \rangle \leq -ma(x)$ . This can be verified by considering 2 cases. If  $\|x\|_2 \leq R$ , then  $\nabla a(x) = 0$  and  $a(x) = 0$ . If  $\|x\|_2 \geq R$ , then by Assumption A,

$$\langle \nabla a(x), -\nabla U(x) \rangle \leq -m(\|x\|_2 - R)_+ \|w\|_2 \leq -m(\|x\|_2 - R)_+^2 = -m \cdot a(x)$$

3.  $a(x) \geq \frac{1}{2}\|x\|_2^2 - 2R^2$ . One can first verify that  $a(x) \geq (\|x\|_2 - R)^2 - R^2$ . Next, by Young's inequality,  $(\|x\|_2 - R)^2 = \|x\|_2^2 + R^2 - 2\|x\|_2 R \geq \|x\|_2^2 + R^2 - \frac{1}{2}\|x\|_2^2 - 2R^2 = \frac{1}{2}\|x\|_2^2 - R^2$ .



Therefore,

$$\begin{aligned} \frac{d}{dt} \mathbb{E}[a(x_t)] &= \mathbb{E}[\langle \nabla a(x_t), -\nabla U(x_t) dt \rangle] + \frac{1}{2} \mathbb{E}[\text{tr}(M(x_t)^2 \nabla^2 a(x)))] \leq -m \mathbb{E}[a(x_t)] + \beta^2 \\ \Rightarrow \frac{d}{dt} \left( \mathbb{E}[a(x_t)] - \frac{\beta^2}{m} \right) &\leq -m \left( \mathbb{E}[a(x_t)] - \frac{\beta^2}{m} \right) \\ \Rightarrow \frac{d}{dt} \left( \mathbb{E}[a(x_t)] - R^2 - \frac{\beta^2}{m} \right) &\leq -m \left( \mathbb{E}[a(x_t)] - R^2 - \frac{\beta^2}{m} \right) \end{aligned}$$

Thus if  $\mathbb{E}[\|x_0\|_2^2] \leq R^2 + \frac{\beta^2}{m}$ , then  $\mathbb{E}[a(x_0)] \leq R^2 - \frac{\beta^2}{m}$ , then  $\left( \mathbb{E}[a(x_0)] - R^2 - \frac{\beta^2}{m} \right) \leq 0$ , and  $\left( \mathbb{E}[a(x_t)] - R^2 + \frac{\beta^2}{m} \right) \leq e^{-mt} \cdot 0 \leq 0$  for all  $t$ . This implies that, for all  $t$ ,

$$\mathbb{E}[\|x_t\|_2^2] \leq \mathbb{E}[2a(x_t) + 4R^2] \leq 6 \left( R^2 + \frac{\beta^2}{m} \right)$$

For our second claim that  $\mathbb{E}_{p^*}[\|x\|_2^2] \leq R^2 + \frac{\beta^2}{m}$ , we can use the fact that if  $x_0 \sim p^*$ , then  $\mathbb{E}[a(x_t)]$  does not change as  $p^*$  is invariant, so that

$$0 = \frac{d}{dt} \mathbb{E}[a(x_t)] \leq -m \mathbb{E}[a(x_t)] + \beta^2$$

Thus

$$\mathbb{E}[a(x_t)] \leq \frac{\beta^2}{m}$$

Again,

$$\mathbb{E}_{p^*}[\|x\|_2^2] = \mathbb{E}[\|x_t\|_2^2] \leq 2\mathbb{E}[a(x_t)] + 4R^2 \leq 4 \left( R^2 + \frac{\beta^2}{m} \right)$$

■

**Lemma 8** *Let the sequence  $y_{k\delta}$  be as defined in (1). Assuming that  $\delta \leq m/(16L^2)$  and  $\mathbb{E}[\|y_0\|_2^2] \leq 2 \left( R^2 + \frac{\beta^2}{m} \right)$  Then for all  $k$ ,*

$$\mathbb{E}[\|y_{k\delta}\|_2^2] \leq 8 \left( R^2 + \frac{\beta^2}{m} \right)$$

**Proof**

Let  $a(w) := (\|w\|_2 - R)_+^2$ . We can verify that

$$\begin{aligned} \nabla a(w) &= (\|w\|_2 - R)_+ \frac{w}{\|w\|_2} \\ \nabla^2 a(w) &= \mathbb{1}\{\|w\|_2 \geq R\} \frac{ww^T}{\|w\|_2^2} + (\|w\|_2 - R)_+ \frac{1}{\|w\|_2} \left( I - \frac{ww^T}{\|w\|_2^2} \right) \end{aligned}$$

Observe that

1.  $\|\nabla^2 a(w)\|_2 \leq 2\mathbb{1}\{\|w\|_2 \geq R\} \leq 2$
2.  $\langle \nabla a(w), -\nabla U(w) \rangle \leq -ma(w)$ .
3.  $a(w) \geq \frac{1}{2}\|w\|_2^2 - 2R^2$ .

The proofs are identical to the proof at the start of Lemma 9, so we omit them here.

Using Taylor's Theorem, and taking expectation of  $y_{(k+1)\delta}$  conditioned on  $y_{k\delta}$ ,

$$\begin{aligned}
 & \mathbb{E} [a(y_{(k+1)\delta})] \\
 = & \mathbb{E} [a(y_{k\delta})] + \mathbb{E} [\langle \nabla a(y_{k\delta}), y_{(k+1)\delta} - y_{k\delta} \rangle] \\
 & + \mathbb{E} \left[ \int_0^1 \int_0^t \langle \nabla^2 a(y_{k\delta} + s(y_{(k+1)\delta} - y_{k\delta})), (y_{(k+1)\delta} - y_{k\delta})(y_{(k+1)\delta} - y_{k\delta})^T \rangle dt ds \right] \\
 \leq & \mathbb{E} [a(y_{k\delta})] + \mathbb{E} [\langle \nabla a(y_{k\delta}), y_{(k+1)\delta} - y_{k\delta} \rangle] + \mathbb{E} \left[ \|(y_{(k+1)\delta} - y_{k\delta})\|_2^2 ds \right] \\
 \leq & \mathbb{E} [a(y_{k\delta})] + \mathbb{E} [\langle \nabla a(y_{k\delta}), -\delta \nabla U(y_{k\delta}) \rangle] + 2\delta^2 \|\nabla U(y_{k\delta})\|_2^2 + 2\delta \mathbb{E} [\text{tr}(M(y_{k\delta})^2)] \\
 \leq & \mathbb{E} [a(y_{k\delta})] - m\delta \mathbb{E} [a(y_{k\delta})] + 2\delta^2 \mathbb{E} [\|\nabla U(y_{k\delta})\|_2^2] + 2\delta \mathbb{E} [\text{tr}(M(y_{k\delta})^2)] \\
 \leq & \mathbb{E} [a(y_{k\delta})] - m\delta \mathbb{E} [a(y_{k\delta})] + 2\delta^2 L^2 \mathbb{E} [\|y_{k\delta}\|_2^2] + 2\delta \beta^2 \\
 \leq & \mathbb{E} [a(y_{k\delta})] - m\delta \mathbb{E} [a(y_{k\delta})] + 4\delta^2 L^2 \mathbb{E} [a(y_{k\delta})] + 8\delta^2 L^2 R^2 + 2\delta \beta^2 \\
 \leq & (1 - m\delta/2) \mathbb{E} [a(y_{k\delta})] + m\delta R^2 + 2\delta \beta^2
 \end{aligned}$$

Where the first inequality uses the upper bound on  $\|\nabla^2 a(y)\|_2$  above, the second inequality uses the fact that  $y_{(k+1)\delta} \sim \mathcal{N}(y_{k\delta} - \delta \nabla U(y_{k\delta}), \delta M(y_{k\delta}))$ , the third inequality uses claim 2. at the start of this proof, the fourth inequality uses item 2 of Assumption B. The fifth inequality uses claim 3. above, the sixth inequality uses our assumption that  $\delta \leq \frac{m}{16L^2}$ .

Taking expectation wrt  $y_{k\delta}$ ,

$$\begin{aligned}
 & \mathbb{E} [a(y_{(k+1)\delta})] \leq \mathbb{E} [a(y_k)] - m\delta (\mathbb{E} [a(y_{k\delta})] - 2R^2 + 2\beta^2/m) \\
 \Rightarrow & \mathbb{E} [a(y_{(k+1)\delta})] - (2R^2/2 + 2\beta^2/m) \leq (1 - m\delta) (\mathbb{E} [a(y_{k\delta})] - (2R^2 + 2\beta^2/m))
 \end{aligned}$$

Thus, if  $\mathbb{E} [\|y_0\|_2^2] \leq 2R^2 + 2\beta^2/m$ , then  $\mathbb{E} [a(y_0)] - (2R^2 + 2\beta^2/m) \leq 0$ , then  $\mathbb{E} [a(y_{k\delta})] - (2R^2 + 2\beta^2/m) \leq 0$  for all  $k$ , which implies that

$$\mathbb{E} [\|y_{k\delta}\|_2^2] \leq 2\mathbb{E} [a(y_{k\delta})] + 4R^2 \leq 8(R^2 + \beta^2/m)$$

for all  $k$ . ■

**Lemma 9** *Let the sequence  $w_{k\delta}$  be as defined in (1). Assuming that  $\delta \leq m/(16L^2)$  and  $\mathbb{E} [\|w_0\|_2^2] \leq 2\left(R^2 + \frac{\beta^2}{m}\right)$  Then for all  $k$ ,*

$$\mathbb{E} [\|w_{k\delta}\|_2^2] \leq 8\left(R^2 + \frac{\beta^2}{m}\right)$$

### Proof

The proof is almost identical to that of Lemma 8. Let  $a(w) := (\|w\|_2 - R)_+^2$ . We can verify that

$$\begin{aligned}
 \nabla a(w) &= (\|w\|_2 - R)_+ \frac{w}{\|w\|_2} \\
 \nabla^2 a(w) &= \mathbb{1} \{ \|w\|_2 \geq R \} \frac{ww^T}{\|w\|_2^2} + (\|w\|_2 - R)_+ \frac{1}{\|w\|_2} \left( I - \frac{ww^T}{\|w\|_2^2} \right)
 \end{aligned}$$

Observe that

1.  $\|\nabla^2 a(w)\|_2 \leq 2\mathbb{1} \{ \|w\|_2 \geq R \} \leq 2$
2.  $\langle \nabla a(w), -\nabla U(w) \rangle \leq -ma(w)$ .
3.  $a(w) \geq \frac{1}{2}\|w\|_2^2 - 2R^2$ .

The proofs are identical to the proof at the start of Lemma 9, so we omit them here.

Using Taylor's Theorem, and taking expectation of  $w_{(k+1)\delta}$  conditioned on  $w_{k\delta}$ ,

$$\begin{aligned}
 & \mathbb{E} [a(w_{(k+1)\delta})] \\
 = & \mathbb{E} [a(w_{k\delta})] + \mathbb{E} [\langle \nabla a(w_{k\delta}), w_{(k+1)\delta} - w_{k\delta} \rangle] \\
 & + \mathbb{E} \left[ \int_0^1 \int_0^t \langle \nabla^2 a(w_{k\delta} + s(w_{(k+1)\delta} - w_{k\delta})), (w_{(k+1)\delta} - w_{k\delta})(w_{(k+1)\delta} - w_{k\delta})^T \rangle dt ds \right] \\
 \leq & \mathbb{E} [a(w_{k\delta})] + \mathbb{E} [\langle \nabla a(w_{k\delta}), w_{(k+1)\delta} - w_{k\delta} \rangle] + \mathbb{E} \left[ \|(w_{(k+1)\delta} - w_{k\delta})\|_2^2 ds \right] \\
 \leq & \mathbb{E} [a(w_{k\delta})] + \mathbb{E} [\langle \nabla a(w_{k\delta}), -\delta \nabla U(w_{k\delta}) \rangle] + 2\delta^2 \|\nabla U(w_{k\delta})\|_2^2 + 2\delta \mathbb{E} [\|\xi(w_{k\delta}, \eta_k)\|_2^2] \\
 \leq & \mathbb{E} [a(w_{k\delta})] - m\delta \mathbb{E} [a(w_{k\delta})] + 2\delta^2 \mathbb{E} [\|\nabla U(w_{k\delta})\|_2^2] + 2\delta \mathbb{E} [\|\xi(w_{k\delta}, \eta_k)\|_2^2] \\
 \leq & \mathbb{E} [a(w_{k\delta})] - m\delta \mathbb{E} [a(w_{k\delta})] + 2\delta^2 L^2 \mathbb{E} [\|w_{k\delta}\|_2^2] + 2\delta \beta^2 \\
 \leq & \mathbb{E} [a(w_{k\delta})] - m\delta \mathbb{E} [a(w_{k\delta})] + 2\delta^2 L^2 a(w_{k\delta}) + 2\delta^2 L^2 R^2 + 2\delta \beta^2 \\
 \leq & (1 - m\delta/2)a(w_{k\delta}) + m\delta R^2 + 2\delta \beta^2
 \end{aligned}$$

Where the first inequality uses the upper bound on  $\|\nabla^2 a(y)\|_2$  above, the second inequality uses the fact that  $w_{(k+1)\delta} = (y_{k\delta} - \delta \nabla U(y_{k\delta}) = \xi(w_{k\delta}, \eta_k))$ , and  $\mathbb{E} [\xi(w_{k\delta}, \eta_k) | w_{k\delta}] = 0$ , the third inequality uses claim 2. at the start of this proof, the fourth inequality uses item 2 of Assumption B. The fifth inequality uses claim 3. above, the sixth inequality uses our assumption that  $\delta \leq \frac{m}{16L^2}$ .

Taking expectation wrt  $w_{k\delta}$ ,

$$\begin{aligned}
 & \mathbb{E} [a(w_{(k+1)\delta})] \leq \mathbb{E} [a(w_k)] - m\delta (\mathbb{E} [a(w_{k\delta})] - 2R^2 + 2\beta^2/m) \\
 \Rightarrow & \mathbb{E} [a(w_{(k+1)\delta})] - (2R^2/2 + 2\beta^2/m) \leq (1 - m\delta) (\mathbb{E} [a(w_{k\delta})] - (2R^2 + 2\beta^2/m))
 \end{aligned}$$

Thus, if  $\mathbb{E} [\|w_0\|_2^2] \leq 2R^2 + 2\beta^2/m$ , then  $\mathbb{E} [a(w_0)] - (2R^2 + 2\beta^2/m) \leq 0$ , then  $\mathbb{E} [a(w_{k\delta})] - (2R^2 + 2\beta^2/m) \leq 0$  for all  $k$ , which implies that

$$\mathbb{E} [\|w_{k\delta}\|_2^2] \leq 2\mathbb{E} [a(w_{k\delta})] + 4R^2 \leq 8(R^2 + \beta^2/m)$$

for all  $k$ . ■

## C.2. Divergence Bounds

**Lemma 10** *Let  $x_t$  be as defined in (20) (or equivalently (22) or (27)), initialized at  $x_0$ . Then for any  $T \leq \frac{1}{16L}$ ,*

$$\mathbb{E} [\|x_T - x_0\|_2^2] \leq 8(T\beta^2 + T^2 L^2 \mathbb{E} [\|x_0\|_2^2])$$

*If we additionally assume that  $\mathbb{E} [\|x_0\|_2^2] \leq 8(R^2 + \beta^2/m)$  and  $T \leq \frac{\beta^2}{8L^2(R^2 + \beta^2/m)}$ , then*

$$\mathbb{E} [\|x_T - x_0\|_2^2] \leq 16T\beta^2$$

**Proof**

By Ito's Lemma,

$$\begin{aligned}
 & \frac{d}{dt} \mathbb{E} \left[ \|x_t\|_2^2 \right] \\
 &= 2\mathbb{E} \left[ \langle \nabla U(x_t), x_t - x_0 \rangle \right] + \mathbb{E} \left[ \text{tr}(M(x_t)^2) \right] \\
 &\leq 2L\mathbb{E} \left[ \|x_t\|_2 \|x_t - x_0\|_2 \right] + \beta^2 \\
 &\leq 2L\mathbb{E} \left[ \|x_t - x_0\|_2^2 \right] + 2L\mathbb{E} \left[ \|x_0\|_2 \|x_t - x_0\|_2 \right] + \beta^2 \\
 &\leq 2L\mathbb{E} \left[ \|x_t - x_0\|_2^2 \right] + L^2 T \mathbb{E} \left[ \|x_0\|_2^2 \right] + \frac{1}{T} \mathbb{E} \left[ \|x_t - x_0\|_2^2 \right] + \beta^2 \\
 &\leq \frac{2}{T} \mathbb{E} \left[ \|x_t - x_0\|_2^2 \right] + \left( L^2 T \mathbb{E} \left[ \|x_0\|_2^2 \right] + \beta^2 \right)
 \end{aligned}$$

where the first inequality is by item 1 of Assumption A and item 2 of Assumption B, the second inequality is by triangle inequality, the third inequality is by Young's inequality, the last inequality is by our assumption on  $T$ .

Applying Gronwall's inequality for  $t \in [0, T]$ ,

$$\begin{aligned}
 & \left( \mathbb{E} \left[ \|x_t - x_0\|_2^2 \right] + L^2 T^2 \mathbb{E} \left[ \|x_0\|_2^2 \right] + T\beta^2 \right) \\
 &\leq e^2 \left( \mathbb{E} \left[ \|x_0 - x_0\| \right] + L^2 T^2 \mathbb{E} \left[ \|x_0\|_2^2 \right] + T\beta^2 \right) \\
 &\leq 8L^2 T^2 \mathbb{E} \left[ \|x_0\|_2^2 \right] + T\beta^2
 \end{aligned}$$

This concludes our proof. ■

**Lemma 11** *Let  $y_t$  be as defined in (21) (or equivalently (22) or (27)), initialized at  $y_0$ . Then for any  $T$ ,*

$$\mathbb{E} \left[ \|y_T - y_0\|_2^2 \right] \leq T^2 L^2 \mathbb{E} \left[ \|y_0\|_2^2 \right] + T\beta^2$$

*If we additionally assume that  $\mathbb{E} \left[ \|y_0\|_2^2 \right] \leq 8(R^2 + \beta^2/m)$  and  $T \leq \frac{\beta^2}{8L^2(R^2 + \beta^2/m)}$ , then*

$$\mathbb{E} \left[ \|y_T - y_0\|_2^2 \right] \leq 2T\beta^2$$

**Proof**

Notice from the definition in (21) that  $y_T - y_0 \sim \mathcal{N}(-T\nabla U(y_0), TM(y_0)^2)$ , the conclusion immediately follows from where the inequality is by item 1 of Assumption A and item 2 of Assumption B, and the fact that

$$\text{tr}(M(x)^2) = \text{tr}(\mathbb{E} [\xi(x, \eta)\xi(x, \eta)^T]) = \mathbb{E} \left[ \|\xi(x, \eta)\|_2^2 \right]$$
■

**Lemma 12** *Let  $v_t$  be as defined in (29), initialized at  $v_0$ . Then for any  $T = n\delta$ ,*

$$\mathbb{E} \left[ \|v_T - v_0\|_2^2 \right] \leq T^2 L^2 \mathbb{E} \left[ \|v_0\|_2^2 \right] + T\beta^2$$

*If we additionally assume that  $\mathbb{E} \left[ \|v_0\|_2^2 \right] \leq 8(R^2 + \beta^2/m)$  and  $T \leq \frac{\beta^2}{8L^2(R^2 + \beta^2/m)}$ , then*

$$\mathbb{E} \left[ \|v_T - v_0\|_2^2 \right] \leq 2T\beta^2$$

**Proof**

From (29),

$$v_T - v_0 = -T\nabla U(v_0) + \sqrt{\delta} \sum_{i=0}^{n-1} \xi(v_0, \eta_i)$$

Conditioned on the randomness up to time  $i$ ,  $\mathbb{E}[\xi(v_0, \eta_{i+1})] = 0$ . Thus

$$\begin{aligned} & \mathbb{E} \left[ \|v_T - v_0\|_2^2 \right] \\ &= T^2 \mathbb{E} \left[ \|\nabla U(v_0)\|_2^2 \right] + \delta \sum_{i=0}^{n-1} \mathbb{E} \left[ \|\xi(v_0, \eta_i)\|_2^2 \right] \\ &\leq T^2 L^2 \mathbb{E} \left[ \|v_0\|_2^2 \right] + T\beta^2 \end{aligned}$$

where the inequality is by item 1 of Assumption A and item 2 of Assumption B. ■

**Lemma 13** *Let  $w_t$  be as defined in (31), initialized at  $w_0$ . Then for any  $T = n\delta$  such that  $T \leq \frac{1}{2L}$ ,*

$$\mathbb{E} \left[ \|w_T - w_0\|_2^2 \right] \leq 16 \left( T^2 L^2 \mathbb{E} \left[ \|w_0\|_2^2 \right] + T\beta^2 \right)$$

*If we additionally assume that  $\mathbb{E} \left[ \|w_0\|_2^2 \right] \leq 8(R^2 + \beta^2/m)$  and  $T \leq \frac{\beta^2}{8L^2(R^2 + \beta^2/m)}$ , then*

$$\mathbb{E} \left[ \|w_T - w_0\|_2^2 \right] \leq 32T\beta^2$$

**Proof**

$$\begin{aligned} & \mathbb{E} \left[ \|w_{(k+1)\delta} - w_0\|_2^2 \right] \\ &= \mathbb{E} \left[ \left\| w_{k\delta} - \delta \nabla U(w_{k\delta}) + \sqrt{\delta} \xi(w_{k\delta}, \eta_k) - w_0 \right\|_2^2 \right] \\ &= \mathbb{E} \left[ \|w_{k\delta} - \delta \nabla U(w_{k\delta}) - w_0\|_2^2 \right] + \delta \mathbb{E} \left[ \|\xi(w_{k\delta}, \eta_k)\|_2^2 \right] \end{aligned} \tag{36}$$

We can bound  $\delta \mathbb{E} \left[ \|\xi(w_{k\delta}, \eta_k)\|_2^2 \right] \leq \delta\beta^2$  by item 2 of Assumption B.

$$\begin{aligned} & \mathbb{E} \left[ \|w_{k\delta} - \delta \nabla U(w_{k\delta}) - w_0\|_2^2 \right] \\ &\leq \mathbb{E} \left[ (\|w_{k\delta} - w_0 - \delta(\nabla U(w_{k\delta}) - \nabla U(w_0))\|_2 + \delta \|\nabla U(w_0)\|_2)^2 \right] \\ &\leq \left( 1 + \frac{1}{n} \right) \mathbb{E} \left[ \|w_{k\delta} - w_0 - \delta(\nabla U(w_{k\delta}) - \nabla U(w_0))\|_2^2 \right] \\ &\quad + (1+n)\delta^2 \mathbb{E} \left[ \|\nabla U(w_0)\|_2^2 \right] \\ &\leq \left( 1 + \frac{1}{n} \right) (1 + \delta L)^2 \mathbb{E} \left[ \|w_{k\delta} - w_0\|_2^2 \right] + 2n\delta^2 L^2 \mathbb{E} \left[ \|w_0\|_2^2 \right] \\ &\leq e^{1/n+2\delta L} \mathbb{E} \left[ \|w_{k\delta} - w_0\|_2^2 \right] + 2n\delta^2 L^2 \mathbb{E} \left[ \|w_0\|_2^2 \right] \end{aligned}$$

where the first inequality is by triangle inequality, the second inequality is by Young's inequality, the third inequality is by item 1 of Assumption A.

Inserting the above into (36) gives

$$\mathbb{E} \left[ \|w_{(k+1)\delta} - w_0\|_2^2 \right] \leq e^{1/n+2\delta L} \mathbb{E} \left[ \|w_{k\delta} - w_0\|_2^2 \right] + 2n\delta^2 L^2 \mathbb{E} \left[ \|w_0\|_2^2 \right] + \delta\beta^2$$

Applying the above recursively for  $k = 1 \dots n$ , we see that

$$\begin{aligned}
 & \mathbb{E} \left[ \|w_{n\delta} - w_0\|_2^2 \right] \\
 & \leq \sum_{k=0}^{n-1} e^{(n-k) \cdot (1/n + 2\delta L)} \cdot \left( 2n\delta^2 L^2 \mathbb{E} \left[ \|w_0\|_2^2 \right] + \delta\beta^2 \right) \\
 & \leq 16 \left( n^2 \delta^2 L^2 \mathbb{E} \left[ \|w_0\|_2^2 \right] + n\delta\beta^2 \right) \\
 & = 16 \left( T^2 L^2 \mathbb{E} \left[ \|w_0\|_2^2 \right] + T\beta^2 \right)
 \end{aligned}$$

■

### C.3. Discretization Bounds

**Lemma 14** *Let  $v_{k\delta}$  and  $w_{k\delta}$  be as defined in (29) and (31). Then for any  $\delta, n$ , such that  $T := n\delta \leq \frac{1}{16L}$ ,*

$$\mathbb{E} \left[ \|v_T - w_T\|_2^2 \right] \leq 8 \left( 2T^2 L^2 \left( T^2 L^2 \mathbb{E} \left[ \|v_0\|_2^2 \right] + T\beta^2 \right) + TL_\xi^2 \left( 16 \left( T^2 L^2 \mathbb{E} \left[ \|w_0\|_2^2 \right] + T\beta^2 \right) \right) \right)$$

*If we additionally assume that  $\mathbb{E} \left[ \|v_0\|_2^2 \right] \leq 8(R^2 + \beta^2/m)$ ,  $\mathbb{E} \left[ \|w_0\|_2^2 \right] \leq 8(R^2 + \beta^2/m)$  and  $T \leq \frac{\beta^2}{8L^2(R^2 + \beta^2/m)}$ , then*

$$\mathbb{E} \left[ \|v_T - w_T\|_2^2 \right] \leq 32(T^2 L^2 + TL_\xi^2)T\beta^2$$

#### Proof

Using the fact that conditioned on the randomness up to step  $k$ ,  $\mathbb{E} [\xi(v_0, \eta_{k+1}) - \xi(w_{k\delta}, \eta_{k+1})] = 0$ , we can show that for any  $k \leq n$ ,

$$\begin{aligned}
 & \mathbb{E} \left[ \|v_{(k+1)\delta} - w_{(k+1)\delta}\|_2^2 \right] \\
 & = \mathbb{E} \left[ \left\| v_{k\delta} - \delta \nabla U(v_0) - w_{k\delta} + \delta \nabla U(w_{k\delta}) + \sqrt{\delta} \xi(w_0, \eta_k) - \sqrt{\delta} \xi(w_{k\delta}, \eta_k) \right\|_2^2 \right] \\
 & = \mathbb{E} \left[ \|v_{k\delta} - \delta \nabla U(v_0) - w_{k\delta} + \delta \nabla U(w_{k\delta})\|_2^2 \right] + \delta \mathbb{E} \left[ \|\xi(w_0, \eta_k) - \xi(w_{k\delta}, \eta_k)\|_2^2 \right]
 \end{aligned} \tag{37}$$

where the first inequality is by (Assumption on smoothness of  $U$  and  $\xi$ ).

Using (smoothness of  $\xi$ ), and Lemma 12, we can bound

$$\begin{aligned}
 & \delta \mathbb{E} \left[ \|\xi(w_0, \eta_k) - \xi(w_{k\delta}, \eta_k)\|_2^2 \right] \\
 & \leq \delta L_\xi^2 \mathbb{E} \left[ \|w_{k\delta} - w_0\|_2^2 \right] \\
 & \leq \delta L_\xi^2 \left( 16 \left( T^2 L^2 \mathbb{E} \left[ \|w_0\|_2^2 \right] + T\beta^2 \right) \right)
 \end{aligned}$$

We can also bound

$$\begin{aligned}
 & \mathbb{E} \left[ \|v_{k\delta} - \delta \nabla U(v_0) - w_{k\delta} + \delta \nabla U(w_{k\delta})\|_2^2 \right] \\
 & \leq \left( 1 + \frac{1}{n} \right) \mathbb{E} \left[ \|v_{k\delta} - \delta \nabla U(v_{k\delta}) - w_{k\delta} + \delta \nabla U(w_{k\delta})\|_2^2 \right] + (1+n)\delta^2 \mathbb{E} \left[ \|\nabla U(v_{k\delta}) - \nabla U(v_0)\|_2^2 \right] \\
 & \leq \left( 1 + \frac{1}{n} \right) (1 + \delta L)^2 \mathbb{E} \left[ \|v_{k\delta} - w_{k\delta}\|_2^2 \right] + 2n\delta^2 L^2 \mathbb{E} \left[ \|v_{k\delta} - v_0\|_2^2 \right] \\
 & \leq e^{1/n + 2\delta L} \mathbb{E} \|v_{k\delta} - w_{k\delta}\|_2^2 + 2n\delta^2 L^2 \mathbb{E} \left[ \|v_{k\delta} - v_0\|_2^2 \right] \\
 & \leq e^{1/n + 2\delta L} \mathbb{E} \|v_{k\delta} - w_{k\delta}\|_2^2 + 2n\delta^2 L^2 \left( T^2 L^2 \mathbb{E} \left[ \|v_0\|_2^2 \right] + T\beta^2 \right)
 \end{aligned}$$

where the first inequality is by Young's inequality and the second inequality is by item 1 of Assumption A, the fourth inequality uses Lemma 12.

Substituting the above two equation blocks into (37), and applying recursively for  $k = 0 \dots n - 1$  gives

$$\begin{aligned}
 & \mathbb{E} \left[ \|v_T - w_T\|_2^2 \right] \\
 &= \mathbb{E} \left[ \|v_{n\delta} - w_{n\delta}\|_2^2 \right] \\
 &\leq e^{1+2n\delta L} \left( 2n^2\delta^2 L^2 \left( T^2 L^2 \mathbb{E} \left[ \|v_0\|_2^2 \right] + T\beta^2 \right) + n\delta L_\xi^2 \left( 16 \left( T^2 L^2 \mathbb{E} \left[ \|w_0\|_2^2 \right] + T\beta^2 \right) \right) \right) \\
 &\leq 8 \left( 2T^2 L^2 \left( T^2 L^2 \mathbb{E} \left[ \|v_0\|_2^2 \right] + T\beta^2 \right) + TL_\xi^2 \left( 16 \left( T^2 L^2 \mathbb{E} \left[ \|w_0\|_2^2 \right] + T\beta^2 \right) \right) \right)
 \end{aligned}$$

the last inequality is by noting that  $T = n\delta \leq \frac{1}{4L}$ . ■

## D. Regularity of $M$ and $N$

### Lemma 15

1.  $\text{tr}(M(x)^2) \leq \beta^2$
2.  $\text{tr}((M(x)^2 - M(y)^2)^2) \leq 16\beta^2 L_\xi^2 \|x - y\|_2^2$
3.  $\text{tr}((M(x)^2 - M(y)^2)^2) \leq 32\beta^3 L_\xi \|x - y\|_2$

### Proof

In this proof, we will use the fact that  $\xi(\cdot, \eta)$  is  $L_\xi$ -Lipschitz from Assumption B.

The first property is easy to see:

$$\begin{aligned}
 & \text{tr}(M(x)^2) \\
 &= \text{tr}(\mathbb{E}_\eta [\xi(x, \eta)\xi(x, \eta)^T]) \\
 &= \mathbb{E}_\eta [\text{tr}(\xi(x, \eta)\xi(x, \eta)^T)] \\
 &= \mathbb{E}_\eta [\|\xi(x, \eta)\|_2^2] \\
 &\leq \beta^2
 \end{aligned}$$

We now prove the second and third claims. Consider a fixed  $x$  and fixed  $y$ , let  $u_\eta := \xi(x, \eta)$ ,  $v_\eta := \xi(y, \eta)$ . Then

$$\begin{aligned}
 & \text{tr}((M(x)^2 - M(y)^2)^2) \\
 &= \text{tr}((\mathbb{E}_\eta [u_\eta u_\eta^T - v_\eta v_\eta^T])^2) \\
 &= \text{tr}(\mathbb{E}_{\eta, \eta'} [(u_\eta u_\eta^T - v_\eta v_\eta^T)(u_{\eta'} u_{\eta'}^T - v_{\eta'} v_{\eta'}^T)]) \\
 &= \mathbb{E}_{\eta, \eta'} [\text{tr}((u_\eta u_\eta^T - v_\eta v_\eta^T)(u_{\eta'} u_{\eta'}^T - v_{\eta'} v_{\eta'}^T))]
 \end{aligned}$$

For any fixed  $\eta$  and  $\eta'$ , let's further simplify notation by letting  $u, u', v, v'$  denote  $u_\eta, u_{\eta'}, v_\eta, v_{\eta'}$ . Thus

$$\begin{aligned}
 & \text{tr}((uu^T - vv^T)(u'u'^T - v'v'^T)) \\
 &= \text{tr}(((u-v)v^T + v(u-v)^T + (u-v)(u-v)^T)((u'-v')v'^T + v'(u'-v')^T + (u'-v')(u'-v')^T)) \\
 &= \text{tr}((u-v)v^T(u'-v')v'^T) + \text{tr}((u-v)v^T v'(u'-v')^T) + \text{tr}((u-v)v^T(u'-v')(u'-v')^T) \\
 &\quad + \text{tr}(v(u-v)^T(u'-v')v'^T) + \text{tr}(v(u-v)^T v'(u'-v')^T) + \text{tr}(v(u-v)^T(u'-v')(u'-v')^T) \\
 &\quad + \text{tr}((u-v)(u-v)^T(u'-v')v'^T) + \text{tr}((u-v)(u-v)^T v'(u'-v')^T) \\
 &\quad + \text{tr}((u-v)(u-v)^T(u'-v')(u'-v')^T) \\
 &\leq \min \left\{ 16\beta^2 L_\xi^2 \|x - y\|_2^2, 32\beta^3 L_\xi \|x - y\|_2 \right\}
 \end{aligned}$$

Where the last inequality uses Assumption B.2 and B.3; in particular,  $\|v\|_2 \leq \beta$  and  $\|u - v\|_2 \leq \min\{2\beta, L_\xi\|x - y\|_2\}$ . This proves 2. and 3. of the Lemma statement. ■

**Lemma 16** *Let  $N(x)$  be as defined in (6) and  $L_N$  be as defined in (7). Then*

1.  $\text{tr}(N(x)^2) \leq \beta^2$
2.  $\text{tr}\left((N(x) - N(y))^2\right) \leq L_N^2\|x - y\|_2^2$
3.  $\text{tr}\left((N(x) - N(y))^2\right) \leq \frac{8\beta^2}{c_m} \cdot L_N\|x - y\|_2$ .

### Proof of Lemma 16

The first inequality holds because  $N(x)^2 := M(x)^2 - c_m^2 I$ , and then applying Lemma 15.1, and the fact that  $\text{tr}(M(x)^2 - c_m^2 I) \leq \text{tr}(M(x)^2)$  by Assumption B.4.

The second inequality is a immediate consequence of Lemma 17, Lemma 15.2, and the fact that  $\lambda_{\min}(N(x)^2) = \lambda_{\min}(M(x)^2 - c_m^2) \geq c_m^2$  by Assumption B.4.

The proof for the third inequality is similar to the second inequality, and follows from Lemma 15 and Lemma 17. ■

**Lemma 17 (Simplified version of Lemma 1 from (Eldan et al., 2018))** *Let  $A, B$  be positive definite matrices. Then*

$$\text{tr}\left(\left(\sqrt{A} - \sqrt{B}\right)^2\right) \leq \text{tr}\left((A - B)^2 A^{-1}\right)$$

## E. Defining $f$ and related inequalities

In this section, we define the Lyapunov function  $f$  which is central to the proof of our main results. Here, we give an overview of the various functions defined in this section:

1.  $g(z) : \mathbb{R}^d \rightarrow \mathbb{R}^+$ : A smoothed version of  $\|z\|_2$ , with bounded derivatives up to third order.
2.  $q(r) : \mathbb{R}^+ \rightarrow \mathbb{R}^+$ : A concave potential function, similar to the one defined in (Eberle, 2016), which has bounded derivatives up to third order everywhere except at  $r = 0$ .
3.  $f(z) = q(g(z)) : \mathbb{R}^d \rightarrow \mathbb{R}^+$ , a concave function which upper and lower bounds  $\|z\|_2$  within a constant factor, has bounded derivatives up to third order everywhere.

**Lemma 18 (Properties of  $f$ )** *Let  $\epsilon$  satisfy  $\epsilon \leq \frac{\mathcal{R}_q}{\alpha_q \mathcal{R}_q^2 + 1}$ . We define the function*

$$f(z) := q(g(z))$$

Where  $q$  is as defined in (39) Appendix E.1, and  $g$  is as defined in Lemma 20 (with parameter  $\epsilon$ ). Then

1. (a)  $\nabla f(z) = q'(g(z)) \cdot \nabla g(z)$   
 (b) For  $\|z\|_2 \geq 2\epsilon$ ,  $\nabla f(z) = q'(g(z)) \frac{z}{\|z\|_2}$   
 (c) For all  $z$ ,  $\|\nabla f(z)\|_2 \leq 1$ .
2. (a)  $\nabla^2 f(z) = q''(g(z)) \nabla g(z) \nabla g(z)^T + q'(g(z)) \nabla^2 g(z)$   
 (b) For  $r \geq 2\epsilon$ ,  $\nabla^2 f(z) = q''(g(z)) \frac{zz^T}{\|z\|_2^2} + q'(g(z)) \frac{1}{\|z\|_2} \left(I - \frac{zz^T}{\|z\|_2^2}\right)$   
 (c) For all  $z$ ,  $\|\nabla^2 f(z)\|_2 \leq \frac{2}{\epsilon}$   
 (d) For all  $z, v$ ,  $v^T \nabla^2 f(z) v \leq \frac{q'(g(z))}{\|z\|_2}$
3. For any  $z$ ,  $\|\nabla^3 f(z)\|_2 \leq \frac{9}{\epsilon^2}$
4. For any  $z$ ,  $f(z) \in \left[\frac{1}{2} \exp\left(-\frac{7\alpha_q \mathcal{R}_q^2}{3}\right) g(\|z\|_2), g(\|z\|_2)\right] \in \left[\frac{1}{2} \exp\left(-\frac{7\alpha_q \mathcal{R}_q^2}{3}\right) (\|z\|_2 - 2\epsilon), \|z\|_2\right]$



**Proof of Lemma 18**

1. (a) chain rule  
 (b) Use definition of  $\nabla g(z)$  from Lemma 20.  
 (c) By definition,  $\nabla f(z) = q'(g(z))\nabla g(z)$ . From Lemma 21,  $|q'(g(z))| \leq 1$ . By definition,  $\nabla g(z) = h'(\|z\|_2) \frac{z}{\|z\|_2}$ . Our conclusion follows from  $h' \leq 1$  using item 2 of Lemma 19.
2. (a) chain rule  
 (b) by item 2 b) of Lemma 20  
 (c) by item 1 c) and item 2 d) of Lemma 20, and item 3 and item 4 of Lemma 21, and our assumption that  $\epsilon \leq \frac{\mathcal{R}_q}{\alpha_q + \mathcal{R}_q^2 + 1}$ .  
 (d) by item 4 of Lemma 21, and items 2 c) and 2 d) of Lemma 20, and our expression for  $\nabla^2 f(z)$  established in item 2 a).
3. It can be verified that

$$\begin{aligned} \nabla^3 f(z) = & q'''(g(z)) \cdot \nabla g(z) \otimes^3 + q''(g(z)) \nabla g(z) \otimes \nabla^2 g(z) + q''(g(z)) \nabla^2 g(z) \otimes \nabla g(z) \\ & + q''(g(z)) \nabla g(z) \otimes \nabla^2 g(z) + q'(g(z)) \nabla^3 g(z) \end{aligned}$$

Thus

$$\begin{aligned} \|\nabla^3 f(z)\|_2 & \leq |q'''(g(z))| \|\nabla g(z)\|_2^3 + 3q''(g(z)) \|\nabla g(z)\|_2 \|\nabla^2 g(z)\|_2 + q'(g(z)) \|\nabla^3 g(z)\| \\ & \leq 5 \left( \alpha_q + \frac{1}{\mathcal{R}_q^2} \right) (\alpha_q \mathcal{R}_q^2 + 1) + 3 \left( \frac{5\alpha_q \mathcal{R}_q}{4} + \frac{4}{\mathcal{R}_q} \right) \cdot \frac{1}{\epsilon} + \frac{1}{\epsilon^2} \\ & \leq \frac{9}{\epsilon^2} \end{aligned}$$

Where the first inequality uses Lemma 21 and Lemma 20, and the second inequality assumes that  $\epsilon \leq \frac{\mathcal{R}_q}{\alpha_q \mathcal{R}_q^2 + 1}$

4.

$$f(z) \in \left[ \frac{1}{2} \exp\left(-\frac{7\alpha_q \mathcal{R}_q^2}{3}\right) g(\|z\|_2), g(\|z\|_2) \right] \in \left[ \frac{1}{2} \exp\left(-\frac{7\alpha_q \mathcal{R}_q^2}{3}\right) (\|z\|_2 - 2\epsilon), \|z\|_2 \right]$$

The first containment is by Lemma 21.2.:  $\frac{1}{2} \exp\left(-\frac{7\alpha_q \mathcal{R}_q^2}{3}\right) \cdot g(z) \leq q(g(z)) \leq g(z)$ . The second containment is by Lemma 20.4:  $g(\|z\|_2) \in [\|z\|_2 - 2\epsilon, \|z\|_2]$ . ■

**Lemma 19 (Properties of  $h$ )** Given a parameter  $\epsilon$ , define

$$h(r) := \begin{cases} \frac{r^3}{6\epsilon^2}, & \text{for } r \in [0, \epsilon] \\ \frac{\epsilon}{6} + \frac{r-\epsilon}{2} + \frac{(r-\epsilon)^2}{2\epsilon} - \frac{(r-\epsilon)^3}{6\epsilon^2}, & \text{for } r \in [\epsilon, 2\epsilon] \\ r, & \text{for } r \geq 2\epsilon \end{cases}$$

1. The derivatives of  $h$  are as follows:

$$\begin{aligned} h'(r) &= \begin{cases} \frac{r^2}{2\epsilon^2}, & \text{for } r \in [0, \epsilon] \\ \frac{1}{2} + \frac{r-\epsilon}{\epsilon} - \frac{(r-\epsilon)^2}{2\epsilon^2}, & \text{for } r \in [\epsilon, 2\epsilon] \\ 1, & \text{for } r \geq 2\epsilon \end{cases} \\ h''(r) &= \begin{cases} \frac{r}{\epsilon^2}, & \text{for } r \in [0, \epsilon] \\ \frac{1}{\epsilon} - \frac{r-\epsilon}{\epsilon^2}, & \text{for } r \in [\epsilon, 2\epsilon] \\ 0, & \text{for } r \geq 2\epsilon \end{cases} \\ h'''(r) &= \begin{cases} \frac{1}{\epsilon^2}, & \text{for } r \in [0, \epsilon] \\ -\frac{1}{\epsilon^2}, & \text{for } r \in [\epsilon, 2\epsilon] \\ 0, & \text{for } r \geq 2\epsilon \end{cases} \end{aligned}$$

2. (a)  $h'$  is positive, monotonically increasing.  
 (b)  $h'(0) = 0$ ,  $h'(r) = 1$  for  $r \geq \epsilon$   
 (c)  $\frac{h'(r)}{r} \leq \min\{\frac{1}{\epsilon}, \frac{1}{r}\}$  for all  $r$
3. (a)  $h''(r)$  is positive  
 (b)  $h''(r) = 0$  for  $r = 0$  and  $r \geq 2\epsilon$   
 (c)  $h''(r) \leq \frac{1}{\epsilon}$   
 (d)  $\frac{h''(r)}{r} \leq \frac{1}{\epsilon^2}$
4.  $|h'''(r)| \leq \frac{1}{\epsilon^2}$
5.  $r - 2\epsilon \leq h(r) \leq r$

**Proof of Lemma 19**

The claims can all be verified with simple algebra. ■

**Lemma 20 (Properties of  $g$ )** Given a parameter  $\epsilon$ , let us define

$$g(z) := h(\|z\|_2)$$

Where  $h$  is as defined in Lemma 19 (using parameter  $\epsilon$ ). Then

1. (a)  $\nabla g(z) = h'(\|z\|_2) \frac{z}{\|z\|_2}$   
 (b) For  $\|z\|_2 \geq 2\epsilon$ ,  $\nabla g(z) = \frac{z}{\|z\|_2}$ .  
 (c) For any  $\|z\|_2$ ,  $\|\nabla g(z)\|_2 \leq 1$
2. (a)  $\nabla^2 g(z) = h''(\|z\|_2) \frac{zz^T}{\|z\|_2^2} + h'(\|z\|_2) \frac{1}{\|z\|_2} \left( I - \frac{zz^T}{\|z\|_2^2} \right)$   
 (b) For  $\|z\|_2 \geq 2\epsilon$ ,  $\nabla^2 g(z) = \frac{1}{\|z\|_2} \left( I - \frac{zz^T}{\|z\|_2^2} \right)$ .  
 (c) For  $\|z\|_2 \geq 2\epsilon$ ,  $\|\nabla^2 g(z)\|_2 = \frac{1}{\|z\|_2}$   
 (d) For all  $z$ ,  $\|\nabla^2 g(z)\|_2 \leq \frac{1}{\epsilon}$
3.  $\|\nabla^3 g(z)\|_2 \leq \frac{5}{\epsilon^2}$
4.  $\|z\|_2 - 2\epsilon \leq g(z) \leq \|z\|_2$ .

**Proof of Lemma 20**

All the properties can be verified with algebra. We provide a proof for 3. since it is a bit involved.

Let us define the functions  $\kappa^1(z) = \nabla(\|z\|_2)$ ,  $\kappa^2(z) = \nabla^2(\|z\|_2)$ ,  $\kappa^3(z) = \nabla^3(\|z\|_2)$ . Specifically,

$$\begin{aligned} \kappa^1(z) &= \frac{z}{\|z\|_2} \\ \kappa^2(z) &= \frac{1}{\|z\|_2} \left( I - \frac{zz^T}{\|z\|_2^2} \right) \\ \kappa^3(z) &= -\frac{1}{\|z\|_2^2} \frac{z}{\|z\|_2} \otimes \left( I - \frac{zz^T}{\|z\|_2^2} \right) + \frac{1}{\|z\|_2} \left( \frac{z}{\|z\|_2} \otimes \kappa^2(z) + \kappa^2(z) \otimes \frac{z}{\|z\|_2} \right) \end{aligned}$$

It can be verified that

$$\begin{aligned} \|\kappa^2(z)\|_2 &= \frac{1}{\|z\|_2} \\ \|\kappa^3(z)\|_2 &= \frac{1}{\|z\|_2^2} \end{aligned}$$

It can be verified that  $\nabla^2 g(z)$  has the following form:

$$\begin{aligned} \nabla^3 g(z) &= h'''(\|z\|_2)(\kappa^1(z))^{\otimes 3} + h''(\|z\|_2)\kappa^1(z) \otimes \kappa^2(z) + h''(\|z\|_2)\kappa^2(z) \otimes \kappa^1(z) \\ &\quad + h'(\|z\|_2)\kappa^3(z) + h''(\|z\|_2)\kappa^1(z) \otimes \kappa^2(z) \end{aligned}$$

Thus

$$\|\nabla^3 g(z)\|_2 \leq |h'''(\|z\|_2)| + 3 \frac{h''(\|z\|_2)}{\|z\|_2} + \frac{h'(\|z\|_2)}{\|z\|_2^2} \leq \frac{5}{\epsilon^2}$$

Where we use properties of  $h$  from Lemma 19.

The last claim follows immediately from Lemma 19.4. ■

### E.1. Defining $q$

In this section, we define the function  $q$  that is used in Lemma 18. Our construction is a slight modification to the original construction in (Eberle, 2011).

Let  $\alpha_q$  and  $\mathcal{R}_q$  be as defined in (7). We begin by defining auxiliary functions  $\psi(r)$ ,  $\Psi(r)$  and  $\nu(r)$ , all from  $\mathbb{R}^+$  to  $\mathbb{R}$ :

$$\psi(r) := e^{-\alpha_q \tau(r)}, \quad \Psi(r) := \int_0^r \psi(s) ds, \quad \nu(r) := 1 - \frac{1}{2} \frac{\int_0^r \frac{\mu(s)\Psi(s)}{\psi(s)} ds}{\int_0^{4\mathcal{R}_q} \frac{\mu(s)\Psi(s)}{\psi(s)} ds}, \quad (38)$$

Where  $\tau(r)$  and  $\mu(r)$  are as defined in Lemma 22 and Lemma 23 with  $\mathcal{R} = \mathcal{R}_q$ .

Finally we define  $q$  as

$$q(r) := \int_0^r \psi(s)\nu(s) ds. \quad (39)$$

We now state some useful properties of the distance function  $q$ .

**Lemma 21** *The function  $q$  defined in (39) has the following properties.*

1. For all  $r \leq \mathcal{R}_q$ ,  $q''(r) + \alpha_q q'(r) \cdot r \leq -\frac{\exp\left(-\frac{7\alpha_q \mathcal{R}_q^2}{3}\right)}{32\mathcal{R}_q^2} q(r)$
2. For all  $r$ ,  $\frac{\exp\left(-\frac{7\alpha_q \mathcal{R}_q^2}{3}\right)}{2} \cdot r \leq q(r) \leq r$
3. For all  $r$ ,  $\frac{\exp\left(-\frac{7\alpha_q \mathcal{R}_q^2}{3}\right)}{2} \leq q'(r) \leq 1$
4. For all  $r$ ,  $q''(r) \leq 0$  and  $|q''(r)| \leq \left(\frac{5\alpha_q \mathcal{R}_q}{4} + \frac{4}{\mathcal{R}_q}\right)$
5. For all  $r$ ,  $|q'''(r)| \leq 5\alpha_q + 2\alpha_q(\alpha_q \mathcal{R}_q^2 + 1) + \frac{2(\alpha_q \mathcal{R}_q^2 + 1)}{\mathcal{R}_q^2}$

#### Proof of Lemma 21

**Proof of 1.** It can be verified that

$$\begin{aligned} \psi'(r) &= \psi(r)(-\alpha_q \tau'(r)) \\ \psi''(r) &= \psi(r) \left( (\alpha_q \tau'(r))^2 + \alpha_q \tau''(r) \right) \\ \nu'(r) &= -\frac{1}{2} \frac{\frac{\mu(r)\Psi(r)}{\psi(r)}}{\int_0^{4\mathcal{R}_q} \frac{\mu(s)\Psi(s)}{\psi(s)} ds} \end{aligned}$$

For  $r \in [0, \mathcal{R}_q]$ ,  $\tau'(r) = r$ , so that  $\psi'(r) = \psi(r)(-\alpha_q r)$ . Thus

$$\begin{aligned}
 q'(r) &= \psi(r)\nu(r) \\
 q''(r) &= \psi'(r)\nu(r) + \psi(r)\nu'(r) \\
 &= \psi(r)\nu(r)(-\alpha_q r) + \psi(r)\nu'(r) \\
 &= -\alpha_q r\nu'(r) + \psi(r)\nu'(r) \\
 q''(r) + \alpha_q r q'(r) &= \psi(r)\nu'(r) \\
 &= -\frac{1}{2} \frac{\mu(r)\Psi(r)}{\int_0^{4\mathcal{R}_q} \frac{\mu(s)\Psi(s)}{\psi(s)} ds} \\
 &= -\frac{1}{2} \frac{\Psi(r)}{\int_0^{4\mathcal{R}_q} \frac{\mu(s)\Psi(s)}{\psi(s)} ds}
 \end{aligned}$$

Where the last equality is by definition of  $\mu(r)$  in Lemma 23 and the fact that  $r \leq \mathcal{R}_q$ .

We can upper bound

$$\int_0^{4\mathcal{R}_q} \frac{\mu(s)\Psi(s)}{\psi(s)} ds \leq \int_0^{4\mathcal{R}_q} \frac{\Psi(s)}{\psi(s)} ds \leq \frac{\int_0^{4\mathcal{R}_q} s ds}{\psi(4\mathcal{R}_q)} = \frac{16\mathcal{R}_q^2}{\psi(4\mathcal{R}_q)} \leq 16\mathcal{R}_q^2 \cdot \exp\left(\frac{7\alpha_q \mathcal{R}_q^2}{3}\right)$$

Where the first inequality is by Lemma 23, the second inequality is by the fact that  $\psi(s)$  is monotonically decreasing, the third inequality is by Lemma 22.

Thus

$$\begin{aligned}
 q''(r) + \alpha_q r q'(r) &\leq -\frac{1}{2} \left( \frac{\exp\left(-\frac{7\alpha_q \mathcal{R}_q^2}{3}\right)}{16\mathcal{R}_q^2} \right) \Psi(r) \\
 &\leq -\frac{\exp\left(-\frac{7\alpha_q \mathcal{R}_q^2}{3}\right)}{32\mathcal{R}_q^2} q(r)
 \end{aligned}$$

Where the last inequality is by  $\Psi(r) \geq q(r)$ .

**Proof of 2.** Notice first that  $\nu(r) \geq \frac{1}{2}$  for all  $r$ . Thus

$$\begin{aligned}
 q(r) &:= \int_0^r \psi(s)\nu(s) ds \\
 &\geq \frac{1}{2} \int_0^r \psi(s) ds \\
 &\geq \frac{\exp\left(-\frac{7\alpha_q \mathcal{R}_q^2}{3}\right)}{2} \cdot r
 \end{aligned}$$

Where the last inequality is by Lemma 22.

**Proof of 3.** By definition of  $f$ ,  $q'(r) = \psi(r)\nu(r)$ , and

$$\frac{\exp\left(-\frac{7\alpha_q \mathcal{R}_q^2}{3}\right)}{2} \leq \psi(r)\nu(r) \leq 1$$

Where we use Lemma 22 and the fact that  $\nu(r) \in [1/2, 1]$

**Proof of 4.** Recall that

$$q''(r) = \psi'(r)\nu(r) + \psi(r)\nu'(r)$$

That  $q'' \leq 0$  can immediately be verified from the definitions of  $\psi$  and  $\nu$ .

Thus

$$\begin{aligned} |q''(r)| &\leq |\psi'(r)\nu(r)| + |\psi(r)\nu'(r)| \\ &\leq \alpha_q \tau'(r) + |\psi(r)\nu'(r)| \end{aligned}$$

From Lemma 22, we can upperbound  $\tau'(r) \leq \frac{5\mathcal{R}_q}{4}$ . In addition,  $\Psi(r) = \int_0^r \psi(s) ds \geq r\psi(r)$ , so that

$$\frac{\Psi(r)}{\psi(r)} \geq r \quad (40)$$

(Recall again that  $\psi(s)$  is monotonically decreasing). Thus  $\Psi(r)/r \geq \psi(r)$  for all  $r$ . In addition, using the fact that  $\psi(r) \leq 1$ ,

$$\Psi(r) = \int_0^r \psi(s) ds \leq r \quad (41)$$

Combining the previous expressions,

$$\begin{aligned} |\psi(r)\nu'(r)| &= \left| \frac{1}{2} \frac{\mu(r)\Psi(r)}{\int_0^{4\mathcal{R}_q} \frac{\mu(s)\Psi(s)}{\psi(s)} ds} \right| \\ &\leq \left| \frac{1}{2} \frac{\mu(r)r}{\int_0^{\mathcal{R}_q} \frac{\Psi(s)}{\psi(s)} ds} \right| \\ &\leq \left| \frac{1}{2} \frac{4\mathcal{R}_q}{\int_0^{\mathcal{R}_q} s ds} \right| \\ &\leq \frac{4}{\mathcal{R}_q} \end{aligned}$$

Where the first inequality are by definition of  $\mu(r)$  and (41), and the second inequality is by (40) and the fact that  $\mu(r) = 0$  for  $r \geq 4\mathcal{R}_q$ . Combining with our bound on  $\psi'(r)\nu(r)$  gives the desired bound.

**Proof of 5.**

$$q'''(r) = \psi''(r)\nu(r) + 2\psi'(r)\nu'(r) + \psi(r)\nu''(r)$$

We first bound the middle term:

$$\begin{aligned} |\psi'(r)\nu'(r)| &= |\psi(r)(\alpha_q \tau'(r))\nu'(r)| \\ &\leq \alpha_q |\tau'(r)| |\psi(r)\nu'(r)| \\ &\leq \frac{5\alpha_q \mathcal{R}_q}{4} \cdot \frac{4}{\mathcal{R}_q} \\ &\leq 5\alpha_q \end{aligned}$$

Where the second last line follows from Lemma 22 and our proof of 4..

Next,

$$\psi''(r) = \psi(r)(\alpha_q^2 \tau'(r)^2 - \alpha_q \tau''(r))$$

Thus applying Lemma 22.1 and Lemma 22.3,

$$|\psi''(r)\nu(r)| \leq 2\alpha_q^2 \mathcal{R}_q^2 + \alpha_q$$

Finally,

$$\nu''(r) = \frac{1}{2 \int_0^{4\mathcal{R}_q} \frac{\mu(s)\Psi(s)}{\psi(s)} ds} \cdot \frac{d}{dr} \mu(r)\Psi(r)/\psi(r)$$

Expanding the numerator,

$$\begin{aligned} \frac{d}{dr} \frac{\mu(r)\Psi(r)}{\psi(r)} &= \mu'(r) \frac{\Psi(r)}{\psi(r)} + \mu(r) - \mu(r) \frac{\Psi(r)\psi'(r)}{\psi(r)^2} \\ &= \mu'(r) \frac{\Psi(r)}{\psi(r)} + \mu(r) + \mu(r) \frac{\Psi(r)\psi'(r)\alpha_q\tau'(r)}{\psi(r)^2} \end{aligned}$$

Thus

$$\psi(r)\nu''(r) = \frac{1}{2 \int_0^{4\mathcal{R}_q} \frac{\mu(s)\Psi(s)}{\psi(s)} ds} \cdot (\mu'(r)\Psi(r) + \mu(r)\psi(r) + \mu(r)\Psi(r)\alpha_q\tau'(r))$$

Using the same argument as from the proof of 4., we can bound

$$\begin{aligned} \frac{1}{2 \int_0^{4\mathcal{R}_q} \frac{\mu(s)\Psi(s)}{\psi(s)} ds} &\leq \frac{1}{2 \int_0^{\mathcal{R}_q} s ds} \\ &\leq \frac{1}{\mathcal{R}_q^2} \end{aligned}$$

Finally, from Lemma 23,  $|\mu'(r)| \leq \frac{\pi}{6\mathcal{R}_q}$ , so

$$\begin{aligned} |\psi(r)\nu''(r)| &\leq \frac{\pi/6 + 1 + 5\alpha_q\mathcal{R}_q^2/4}{\mathcal{R}_q^2} \\ &\leq \frac{2(\alpha_q\mathcal{R}_q^2 + 1)}{\mathcal{R}_q^2} \end{aligned}$$

■

**Lemma 22** Let  $\tau(r) : [0, \infty) \rightarrow \mathbb{R}$  be defined as

$$\tau(r) = \begin{cases} \frac{r^2}{2}, & \text{for } r \leq \mathcal{R} \\ \frac{\mathcal{R}^2}{2} + \mathcal{R}(r - \mathcal{R}) + \frac{(r-\mathcal{R})^2}{2} - \frac{(r-\mathcal{R})^3}{3\mathcal{R}}, & \text{for } r \in [\mathcal{R}, 2\mathcal{R}] \\ \frac{5\mathcal{R}^2}{3} + \mathcal{R}(r - 2\mathcal{R}) - \frac{(r-2\mathcal{R})^2}{2} + \frac{(r-2\mathcal{R})^3}{12\mathcal{R}}, & \text{for } r \in [2\mathcal{R}, 4\mathcal{R}] \\ \frac{7\mathcal{R}^2}{3}, & \text{for } r \geq 4\mathcal{R} \end{cases}$$

Then

1.  $\tau'(r) \in [0, \frac{5\mathcal{R}}{4}]$ , with maxima at  $r = \frac{3\mathcal{R}}{2}$ .  $\tau'(r) = 0$  for  $r \in \{0\} \cup [4\mathcal{R}, \infty)$
2. As a consequence of 1,  $\tau(r)$  is monotonically increasing
3.  $\tau''(r) \in [-1, 1]$

**Proof of Lemma 22**

We provide the derivatives of  $\tau$  below. The claims in the Lemma can then be immediately verified.

$$\tau'(r) = \begin{cases} r, & \text{for } r \leq \mathcal{R} \\ \mathcal{R} + (r - \mathcal{R}) - \frac{(r-\mathcal{R})^2}{\mathcal{R}}, & \text{for } r \in [\mathcal{R}, 2\mathcal{R}] \\ \mathcal{R} - (r - 2\mathcal{R}) + \frac{(r-2\mathcal{R})^2}{4\mathcal{R}}, & \text{for } r \in [2\mathcal{R}, 4\mathcal{R}] \\ 0, & \text{for } r \geq 4\mathcal{R} \end{cases}$$

$$\tau''(r) = \begin{cases} 1, & \text{for } r \leq \mathcal{R} \\ 1 - \frac{2(r-\mathcal{R})}{\mathcal{R}}, & \text{for } r \in [\mathcal{R}, 2\mathcal{R}] \\ -1 + \frac{r-2\mathcal{R}}{2\mathcal{R}}, & \text{for } r \in [2\mathcal{R}, 4\mathcal{R}] \\ 0, & \text{for } r \geq 4\mathcal{R} \end{cases}$$

■

**Lemma 23** *Let*

$$\mu(r) := \begin{cases} 1, & \text{for } r \leq \mathcal{R} \\ \frac{1}{2} + \frac{1}{2} \cos\left(\frac{\pi(r-\mathcal{R})}{3\mathcal{R}}\right), & \text{for } r \in [\mathcal{R}, 4\mathcal{R}] \\ 0, & \text{for } r \geq 4\mathcal{R} \end{cases}$$

*Then*

$$\mu'(r) := \begin{cases} 0, & \text{for } r \leq \mathcal{R} \\ -\frac{\pi}{6\mathcal{R}} \sin\left(\frac{\pi(r-\mathcal{R})}{3\mathcal{R}}\right), & \text{for } r \in [\mathcal{R}, 4\mathcal{R}] \\ 0, & \text{for } r \geq 4\mathcal{R} \end{cases}$$

*Furthermore,  $\mu'(r) \in [-\frac{\pi}{6\mathcal{R}}, 0]$*

This Lemma can be easily verified by algebra.

## F. Miscellaneous

The following Theorem, taken from (Eldan et al., 2018), establishes a quantitative CLT.

**Theorem 5** *Let  $X_1 \dots X_n$  be random vectors with mean 0, covariance  $\Sigma$ , and  $\|X_i\| \leq \beta$  almost surely for each  $i$ . Let  $S_n = \frac{1}{\sqrt{n}} \sum_{i=1}^n X_i$ , and let  $Z$  be a Gaussian with covariance  $\Sigma$ , then*

$$W_2(S_n, Z) \leq \frac{6\sqrt{d}\beta\sqrt{\log n}}{\sqrt{n}}$$

**Corollary 24** *Let  $X_1 \dots X_n$  be random vectors with mean 0, covariance  $\Sigma$ , and  $\|X_i\| \leq \beta$  almost surely for each  $i$ . Let  $Y$  be a Gaussian with covariance  $n\Sigma$ . Then*

$$W_2\left(\sum_i X_i, Y\right) \leq 6\sqrt{d}\beta\sqrt{\log n}$$

This is simply taking the result of Theorem 5 and scaling the inequality by  $\sqrt{n}$  on both sides.

The following Lemma is taken from (Cheng et al., 2019) and included here for completeness.

**Lemma 25** *For any  $c > 0$ ,  $x > 3 \max\{\frac{1}{c} \log \frac{1}{c}, 0\}$ , the inequality*

$$\frac{1}{c} \log(x) \leq x$$

*holds.*

### Proof

We will consider two cases:

**Case 1:** If  $c \geq \frac{1}{e}$ , then the inequality

$$\log(x) \leq cx$$

is true for all  $x$ .

**Case 2:**  $c \leq \frac{1}{e}$ .

In this case, we consider the Lambert W function, defined as the inverse of  $f(x) = xe^x$ . We will particularly pay attention to  $W_{-1}$  which is the lower branch of  $W$ . (See Wikipedia for a description of  $W$  and  $W_{-1}$ ).

We can lower bound  $W_{-1}(-c)$  using Theorem 1 from (Chatzigeorgiou, 2013):

$$\begin{aligned} \forall u > 0, \quad W_{-1}(-e^{-u-1}) &> -u - \sqrt{2u} - 1 \\ \text{equivalently } \forall c \in (0, 1/e), \quad -W_{-1}(-c) &< \log\left(\frac{1}{c}\right) + 1 + \sqrt{2\left(\log\left(\frac{1}{c}\right) - 1\right)} - 1 \\ &= \log\left(\frac{1}{c}\right) + \sqrt{2\left(\log\left(\frac{1}{c}\right) - 1\right)} \\ &\leq 3 \log \frac{1}{c} \end{aligned}$$

Thus by our assumption,

$$\begin{aligned} x &\geq 3 \cdot \frac{1}{c} \log\left(\frac{1}{c}\right) \\ \Rightarrow x &\geq \frac{1}{c}(-W_{-1}(-c)) \end{aligned}$$

then  $W_{-1}(-c)$  is defined, so

$$\begin{aligned} x &\geq \frac{1}{c} \max\{-W_{-1}(-c), 1\} \\ \Rightarrow (-cx)e^{-cx} &\geq -c \\ \Rightarrow xe^{-cx} &\leq 1 \\ \Rightarrow \log(x) &\leq cx \end{aligned}$$

The first implication is justified as follows:  $W_{-1}^{-1} : [-\frac{1}{e}, \infty) \rightarrow (-\infty, -1)$  is monotonically decreasing. Thus its inverse  $W_{-1}^{-1}(y) = ye^y$ , defined over the domain  $(-\infty, -1)$  is also monotonically decreasing. By our assumption,  $-cx \leq -3 \log \frac{1}{c} \leq -3$ , thus  $-cx \in (-\infty, -1]$ , thus applying  $W_{-1}^{-1}$  to both sides gives us the first implication. ■

## G. Experiment Details

In this section, we provide additional details of our experiments. In particular, we explain the CNN architecture that we use in our experiments. Denote a convolutional layer with  $p$  input filters and  $q$  output filters by  $\text{conv}(p, q)$ , a fully connected layer with  $q$  outputs by  $\text{fully\_connect}(q)$ , and a max pooling operation with stride 2 as  $\text{pool2}$ . Let  $\text{ReLU}(x) = \max\{x, 0\}$ . Then the CNN architecture in our paper is the following:

$$\begin{aligned} \text{conv}(3, 32) &\Rightarrow \text{ReLU} \Rightarrow \text{conv}(32, 64) \Rightarrow \text{ReLU} \Rightarrow \text{pool2} \Rightarrow \text{conv}(64, 128) \Rightarrow \text{ReLU} \Rightarrow \text{conv}(128, 128) \\ &\Rightarrow \text{ReLU} \Rightarrow \text{pool2} \Rightarrow \text{conv}(128, 256) \Rightarrow \text{ReLU} \Rightarrow \text{conv}(256, 256) \Rightarrow \text{ReLU} \Rightarrow \text{pool2} \Rightarrow \text{fully\_connect}(1024) \\ &\Rightarrow \text{ReLU} \Rightarrow \text{fully\_connect}(512) \Rightarrow \text{ReLU} \Rightarrow \text{fully\_connect}(10). \end{aligned}$$
